# Supplementary material
Source: MDPI journal article supplement (https://www.mdpi.com/2227-9040/10/3/91)
Supplement: s1 [file s1]

# Supporting Information

## Zinc Donor-Acceptor Schiff Base Complexes as Thermally Activated Delayed Fluorescence Emitters

Andreas Russegger, Lisa Eiber, Andreas Steinegger and Sergey M.  
Borisov\*

Institute of Analytical Chemistry and Food Chemistry, Graz University of Technology,  
Stremayrgasse 9, 8010, Graz, Austria

\* [sergey.borisov@tugraz.at](mailto:sergey.borisov@tugraz.at)

# 1 Photophysical Properties

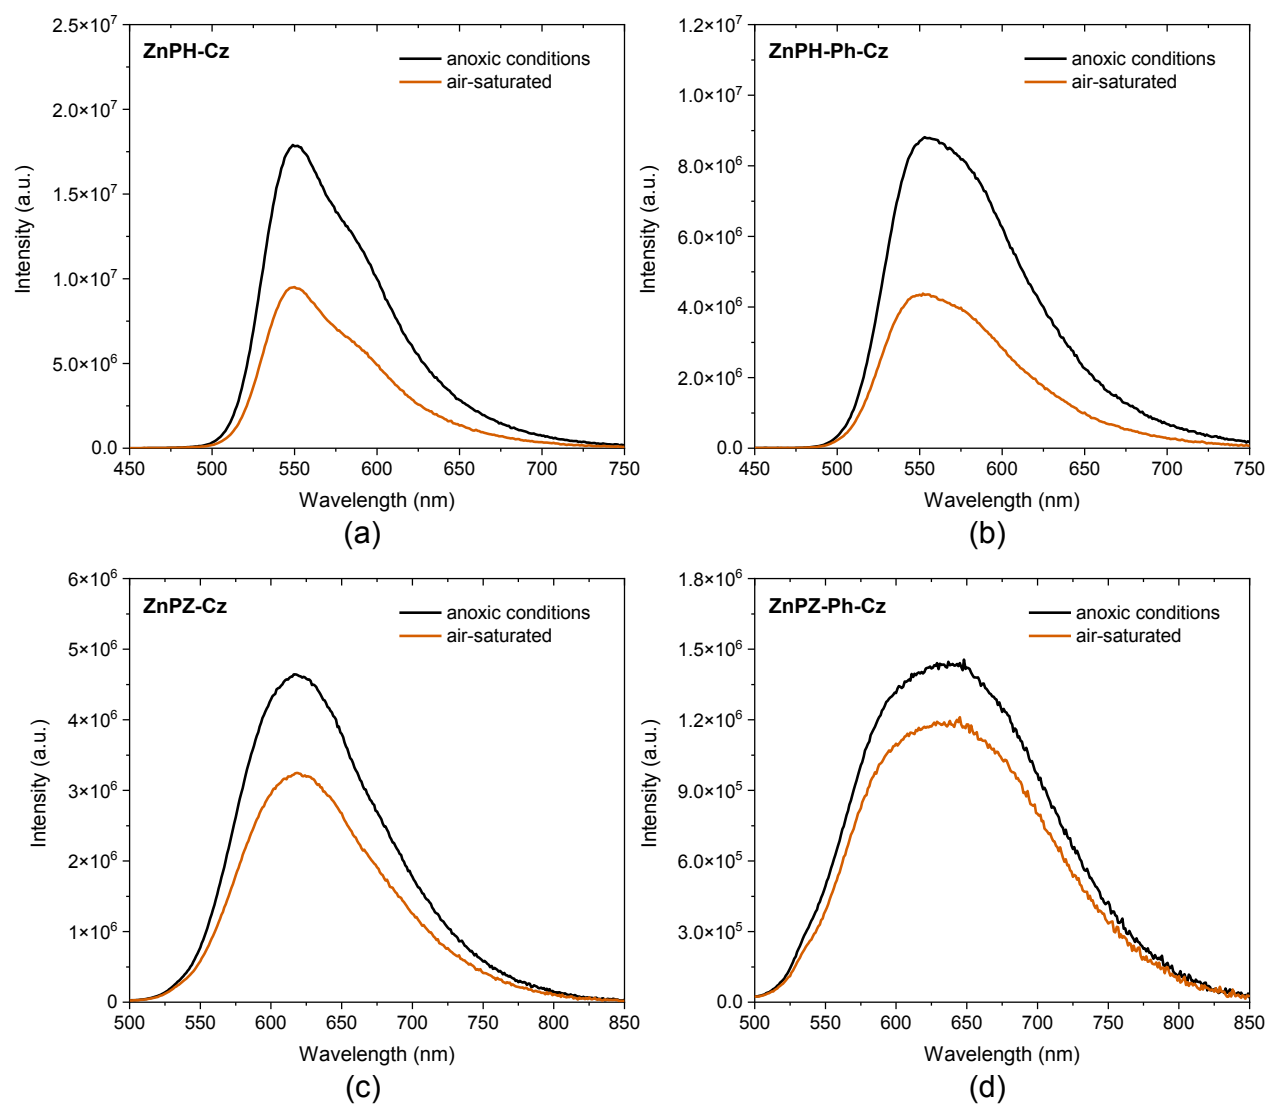

**Figure S1.** Emission spectra of **ZnPH-Cz** (a), **ZnPH-Ph-Cz** (b), **ZnPZ-Cz** (c) and **ZnPZ-Ph-Cz** (d) in toluene under anoxic (degassed with high purity nitrogen) and air-saturated conditions.

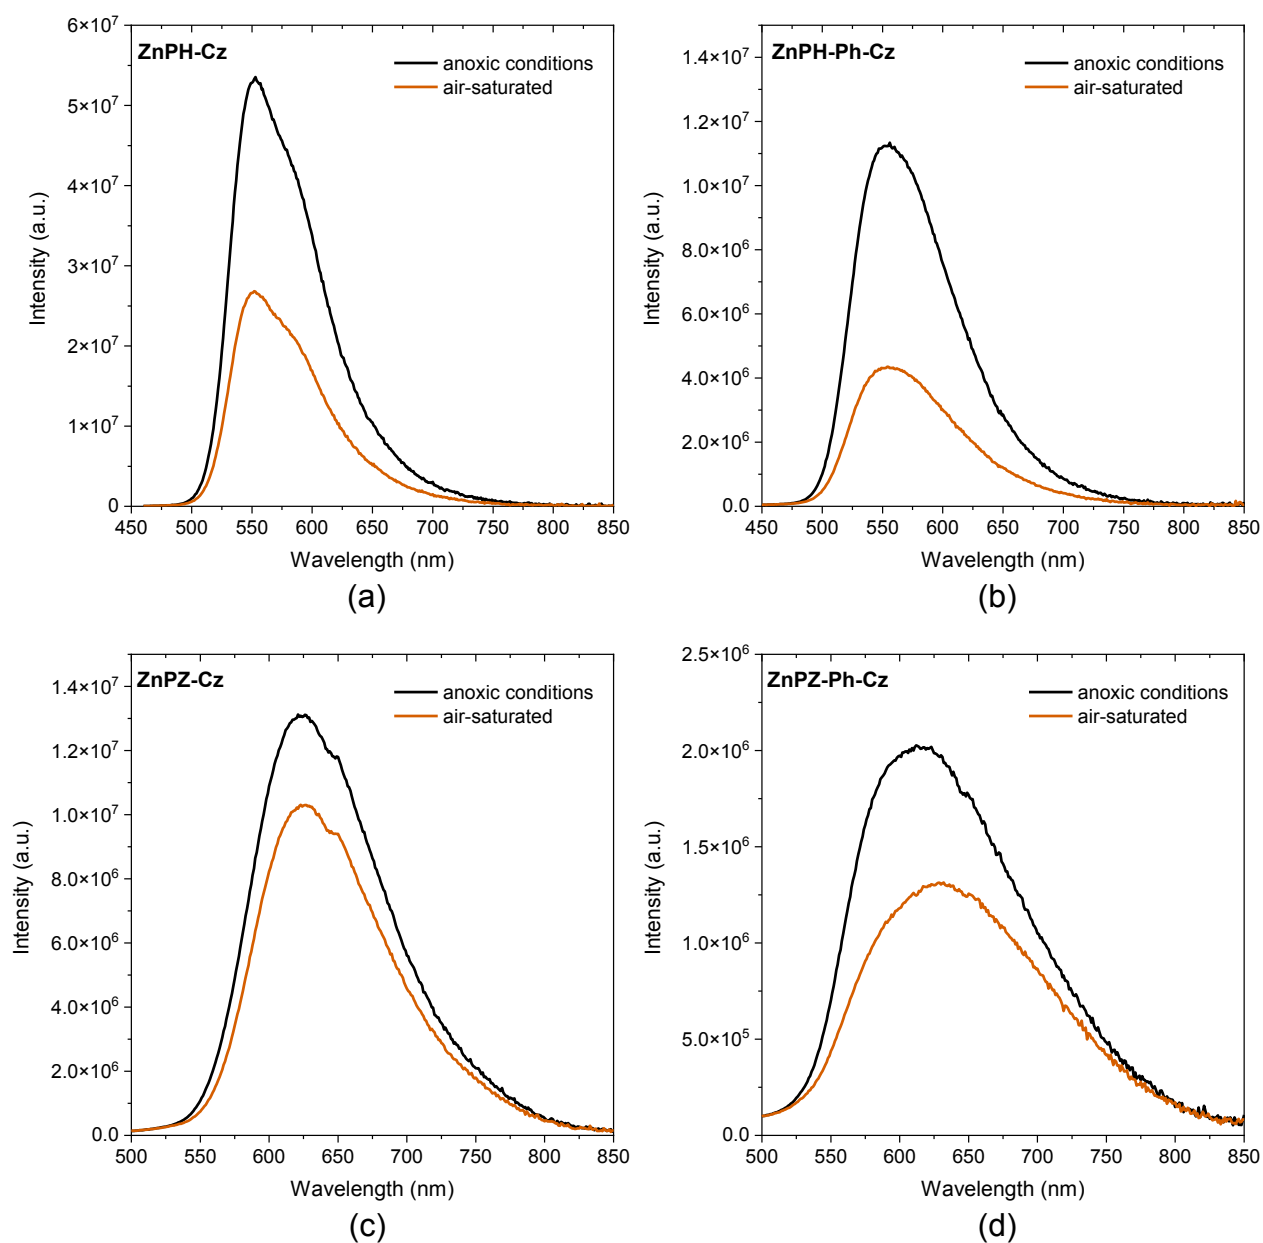

**Figure S2.** Emission spectra of ZnPH-Cz (a), ZnPH-Ph-Cz (b), ZnPZ-Cz (c) and ZnPZ-Ph-Cz (d) measured in polystyrene under anoxic conditions (aqueous solution with 5 w%  $\text{Na}_2\text{SO}_3$  and traces of  $\text{CoCl}_2$ ) and air-saturated conditions.

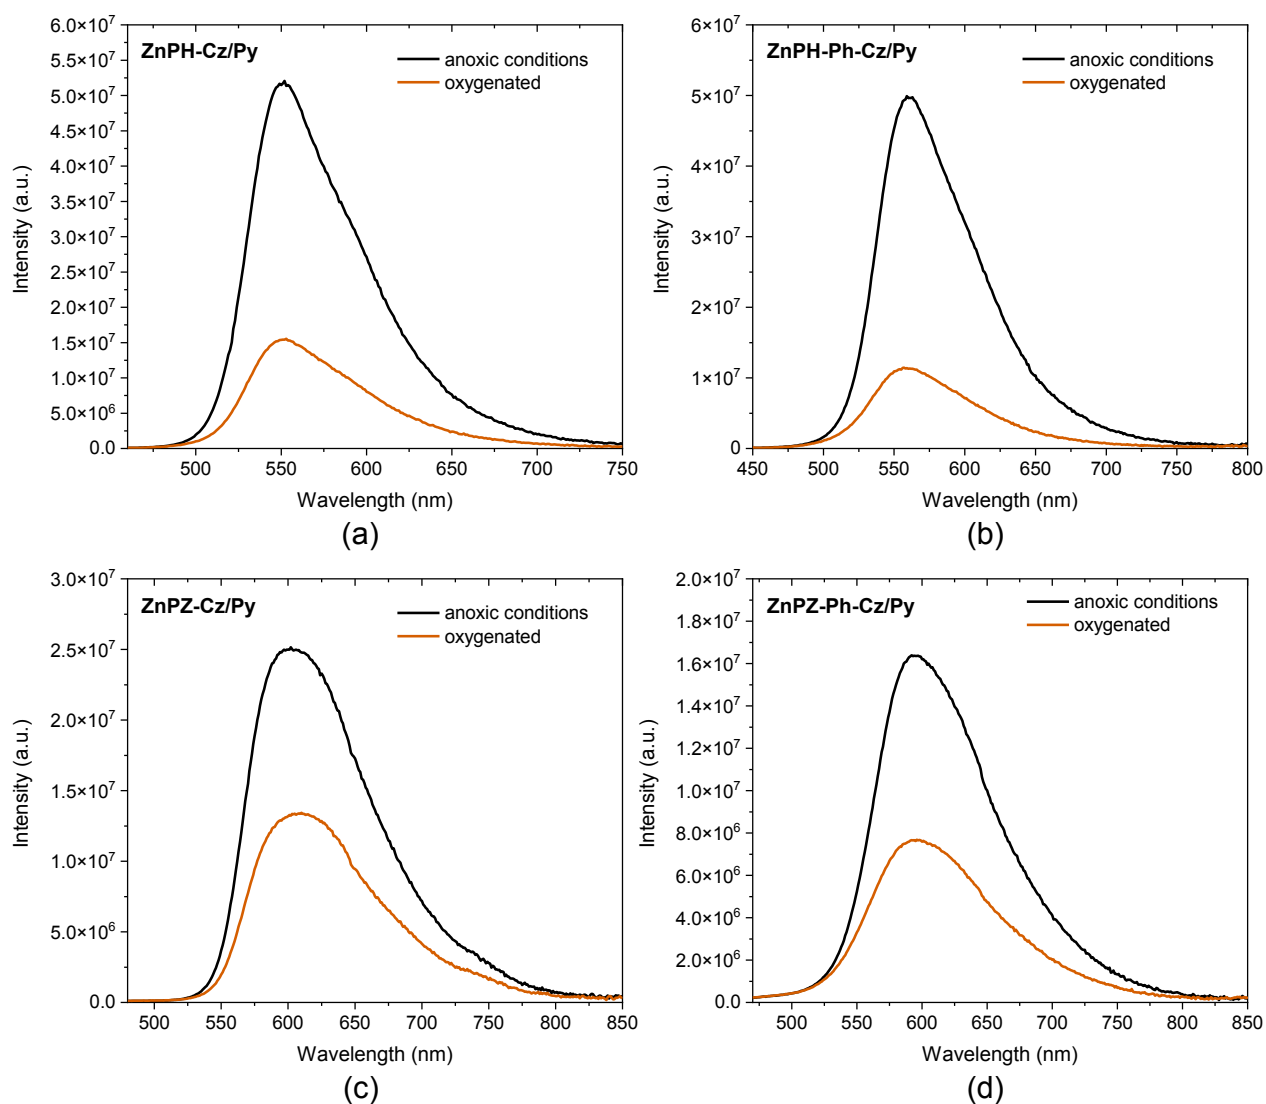

**Figure S3.** Emission spectra of **ZnPH-Cz** (a), **ZnPH-Ph-Cz** (b), **ZnPZ-Cz** (c) and **ZnPZ-Ph-Cz** (d) with pyridine as axial ligands measured in polystyrene under anoxic conditions (aqueous solution with 5 w%  $\text{Na}_2\text{SO}_3$  and traces of  $\text{CoCl}_2$ ) and air-saturated conditions.

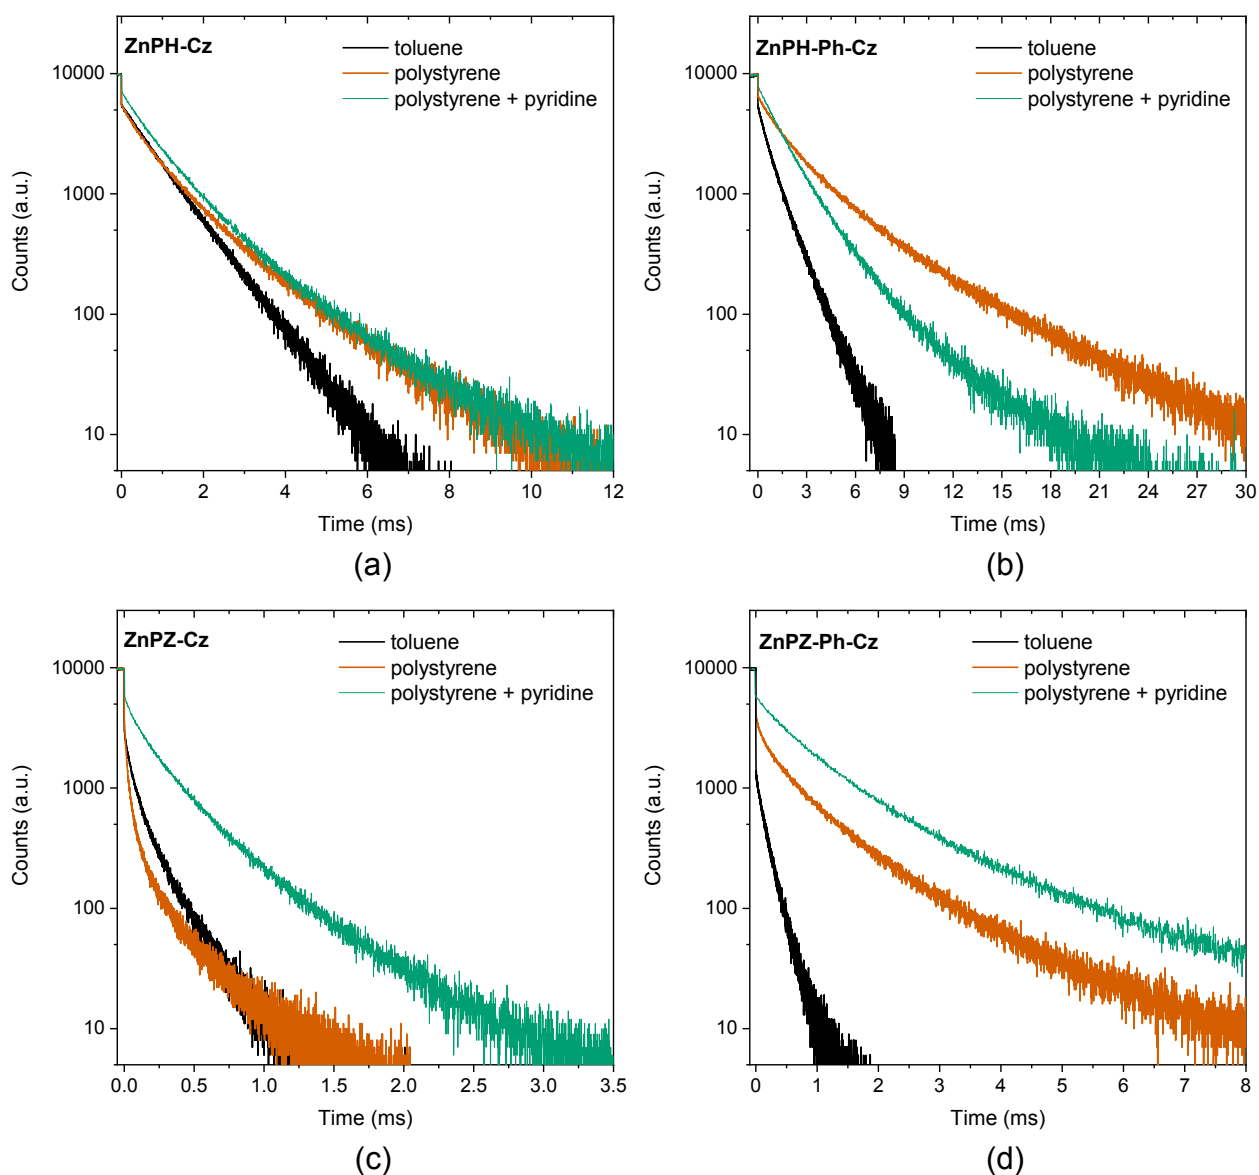

**Figure S4.** TADF decay of **ZnPH-Cz** (a), **ZnPH-Ph-Cz** (b), **ZnPZ-Cz** (c) and **ZnPZ-Ph-Cz** (d) in toluene and polystyrene (with and without pyridine) under anoxic conditions at 25 °C.

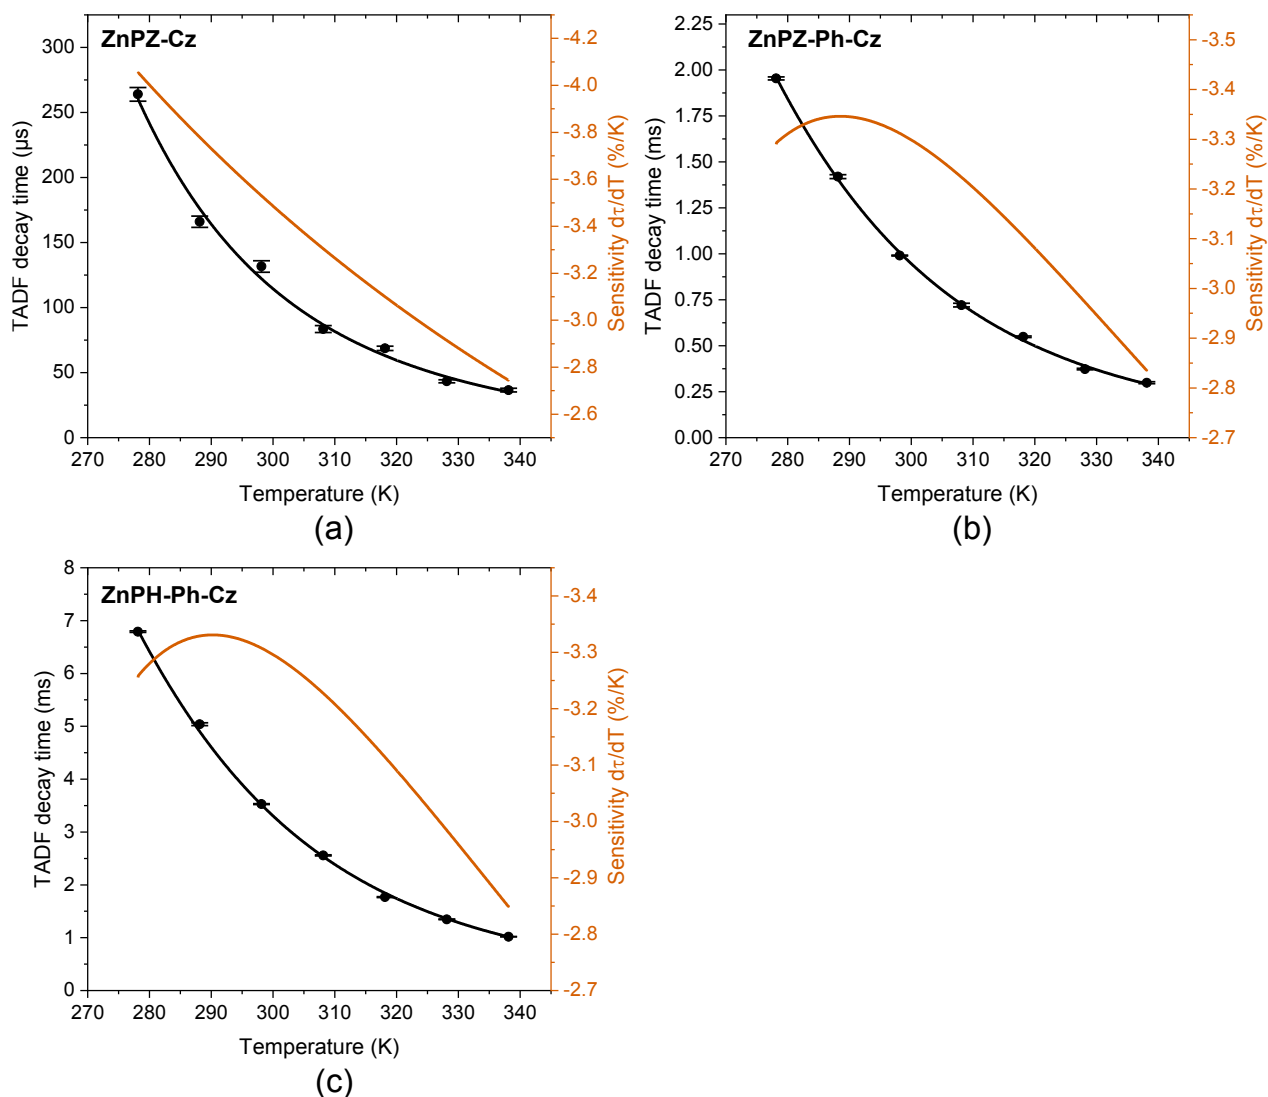

**Figure S5.** Temperature dependency of TADF lifetimes between 5 and 65 °C for **ZnPZ-Cz** (a), **ZnPZ-Ph-Cz** (b) and **ZnPH-Ph-Cz** (c) in PS matrix under anoxic conditions (aqueous solution with 5 w%  $\text{Na}_2\text{SO}_3$  and traces of  $\text{CoCl}_2$ ). In each temperature calibration cycle, three decay time measurements were made at each temperature. The calibration cycle was repeated three times.

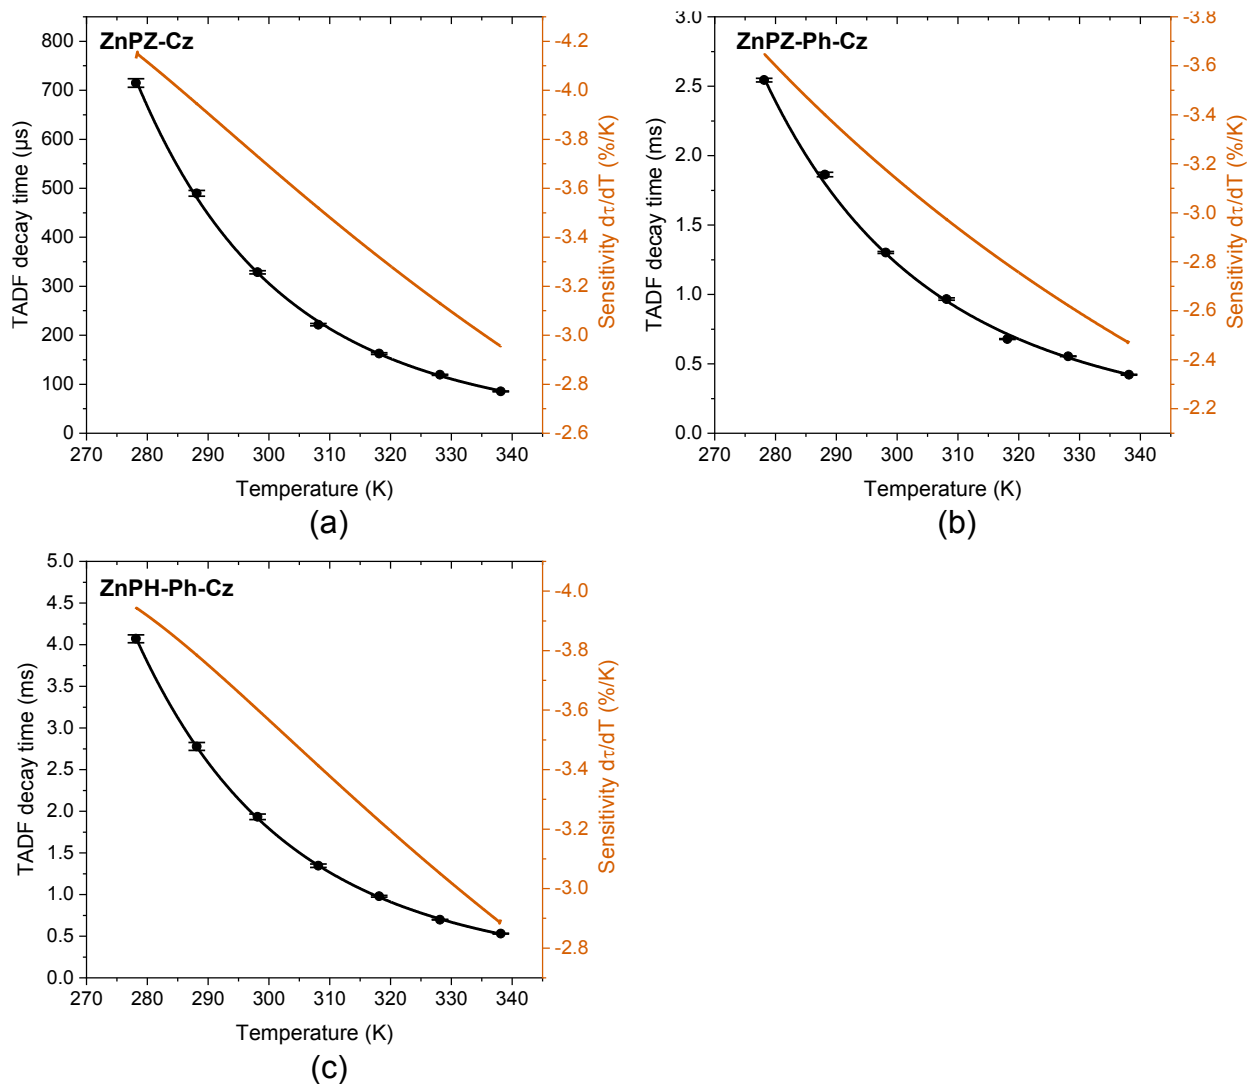

**Figure S6.** Temperature dependency of TADF lifetimes between 5 and 65 °C for **ZnPZ-Cz** (a), **ZnPZ-Ph-Cz** (b) and **ZnPH-Ph-Cz** (c) with pyridine in PS matrix under anoxic conditions (aqueous solution with 5 w%  $\text{Na}_2\text{SO}_3$  and traces of  $\text{CoCl}_2$ ). In each temperature calibration cycle, three decay time measurements were made at each temperature. The calibration cycle was repeated three times.

## 2 NMR Spectra

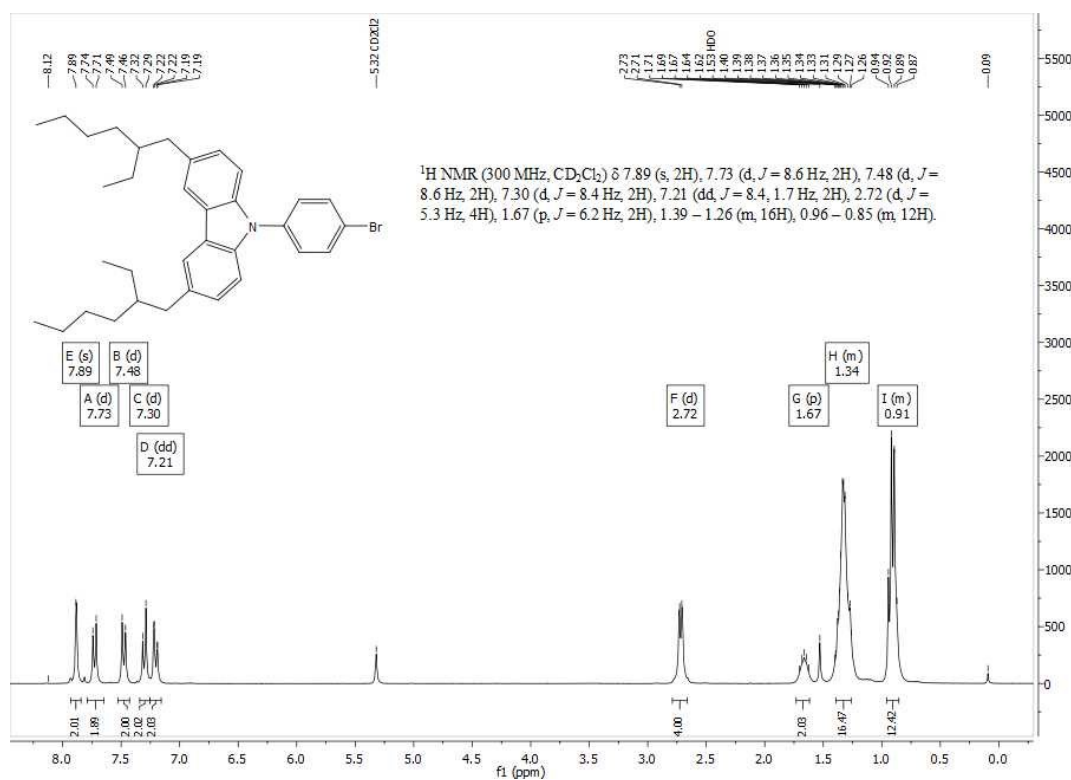

Figure S7. <sup>1</sup>H NMR (300 MHz, CD<sub>2</sub>Cl<sub>2</sub>) of 2.

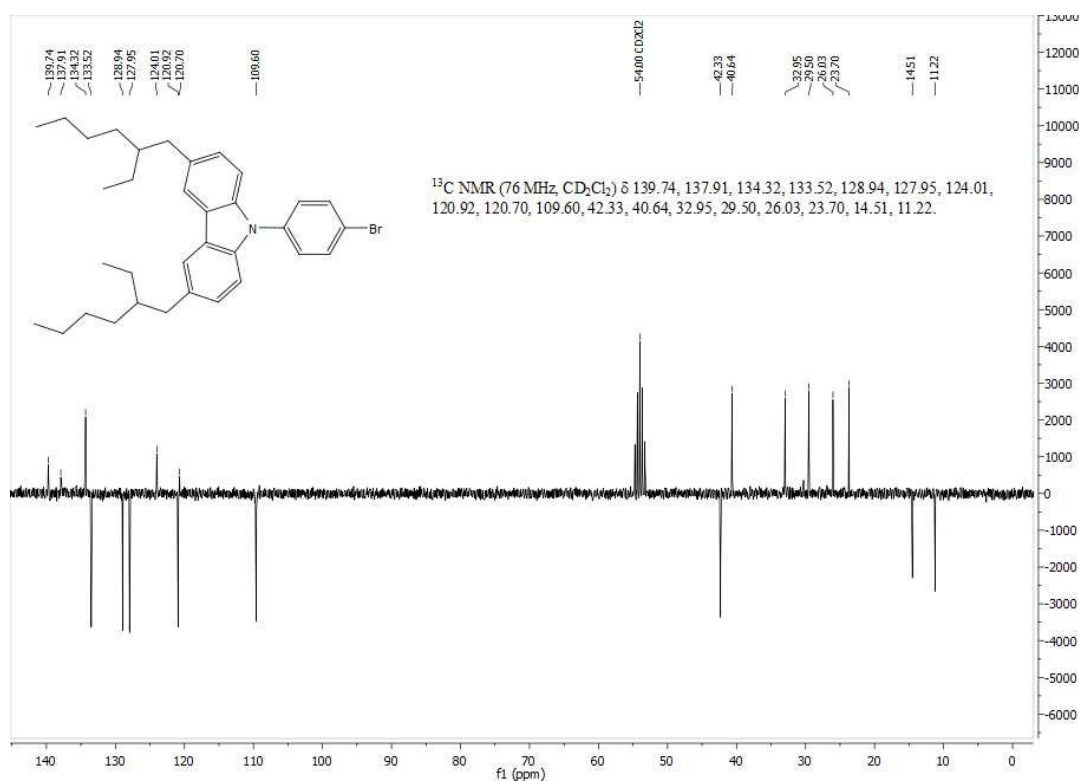

Figure S8. <sup>13</sup>C-APT NMR (76 MHz, CD<sub>2</sub>Cl<sub>2</sub>) of 2.



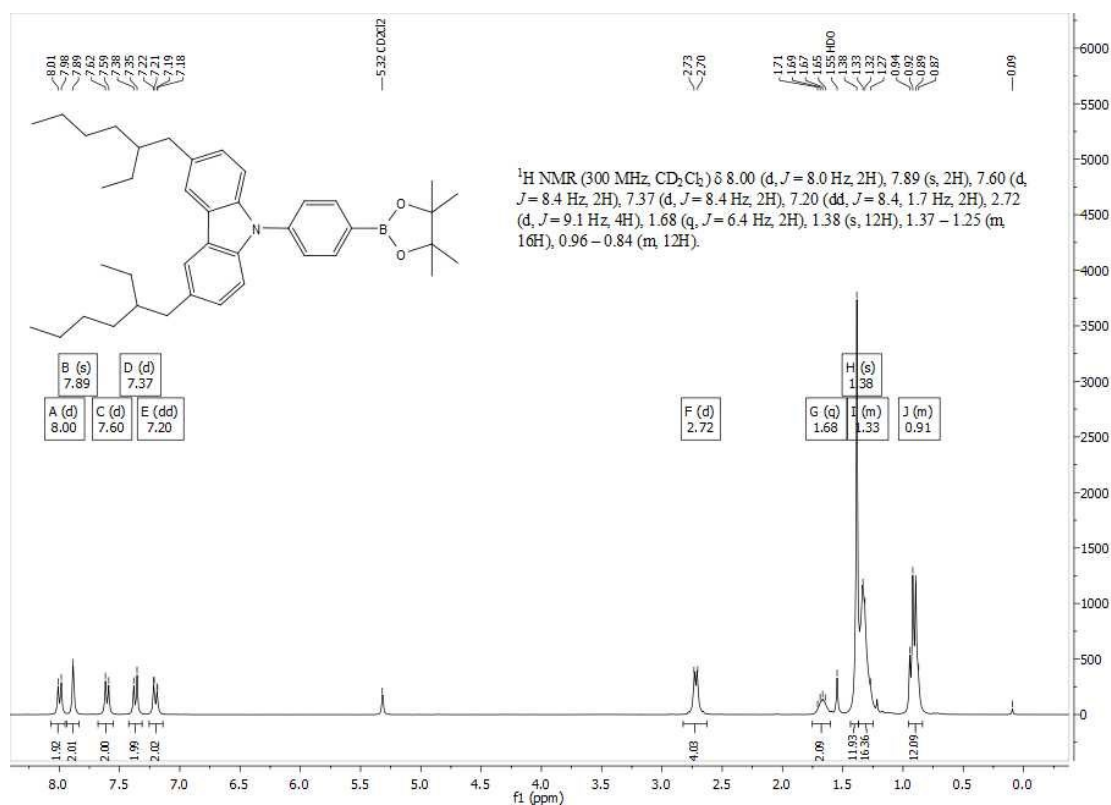

**Figure S9.** <sup>1</sup>H NMR (300 MHz, CD<sub>2</sub>Cl<sub>2</sub>) of **3**.

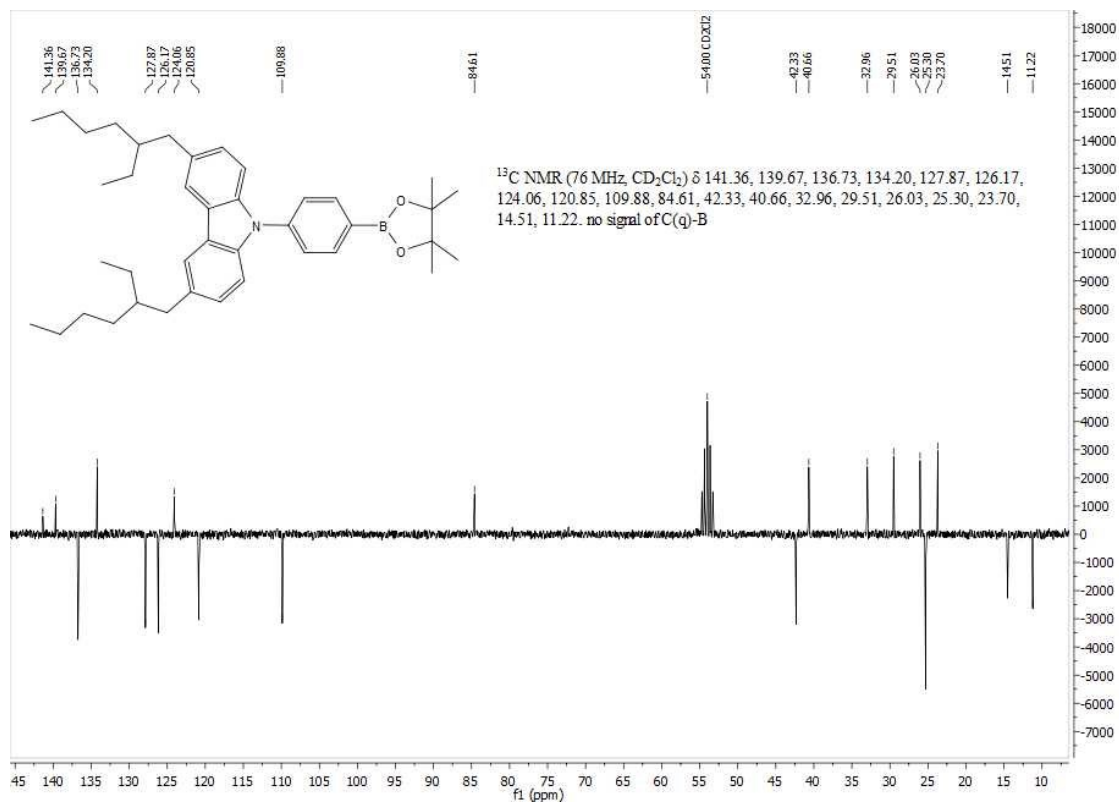

**Figure S10.** <sup>13</sup>C-APT NMR (76 MHz, CD<sub>2</sub>Cl<sub>2</sub>) of **3**.

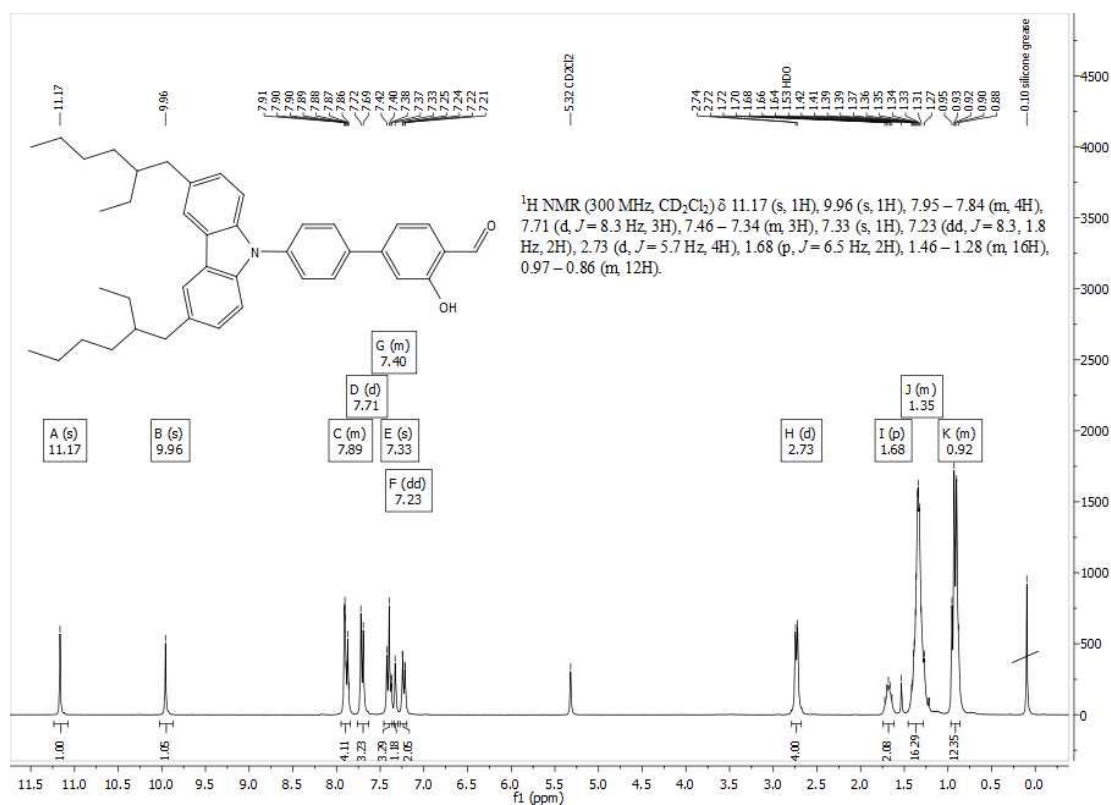

**Figure S11.** <sup>1</sup>H NMR (300 MHz, CD<sub>2</sub>Cl<sub>2</sub>) of **4**.

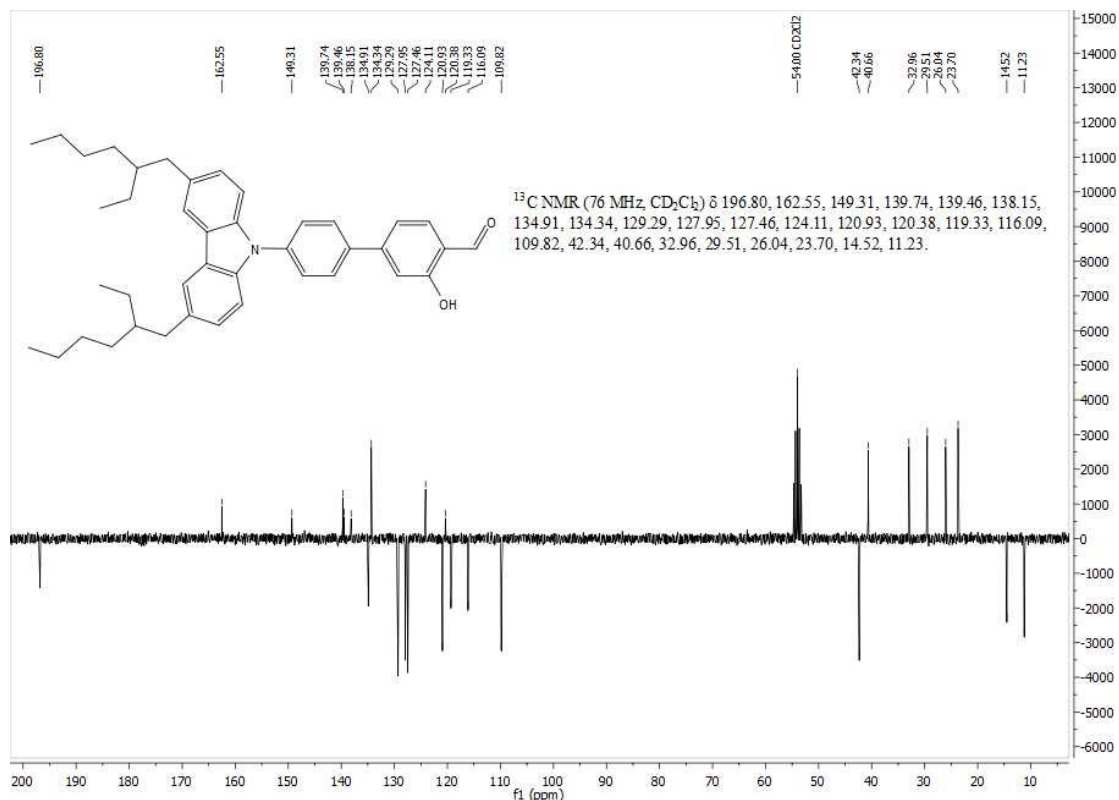

**Figure S12.** <sup>13</sup>C-APT NMR (76 MHz, CD<sub>2</sub>Cl<sub>2</sub>) of **4**.

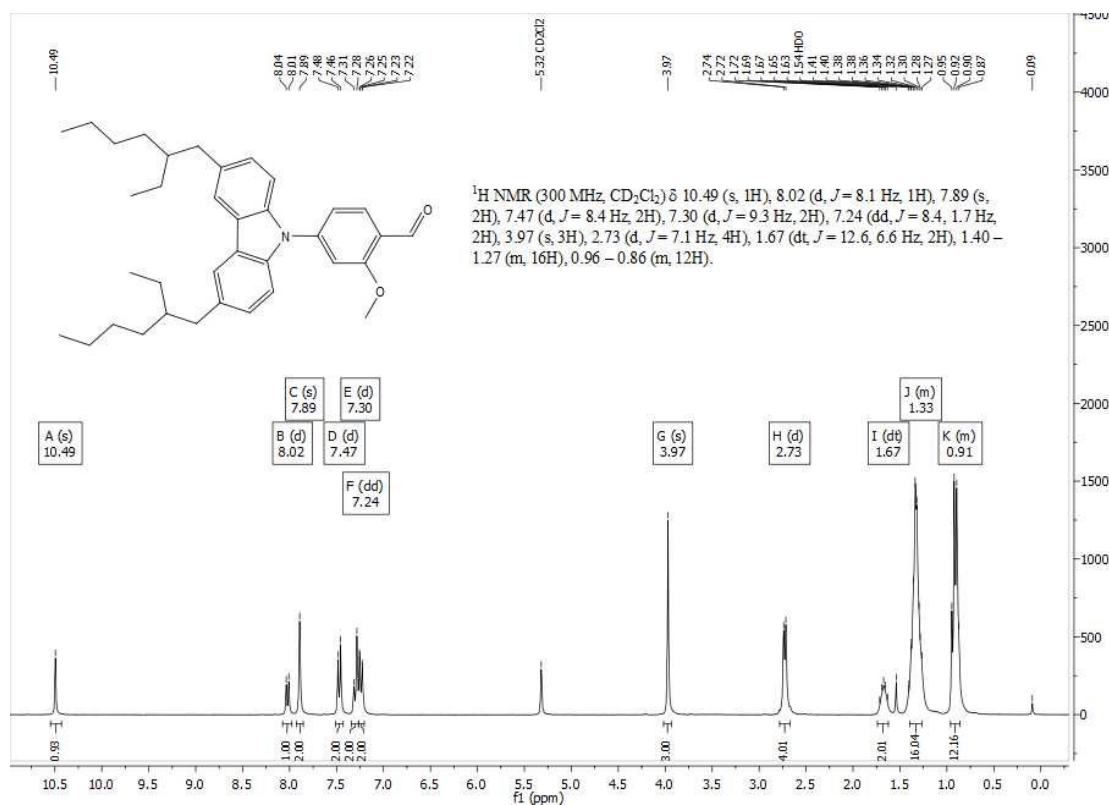

**Figure S13.** <sup>1</sup>H NMR (300 MHz, CD<sub>2</sub>Cl<sub>2</sub>) of **5**.

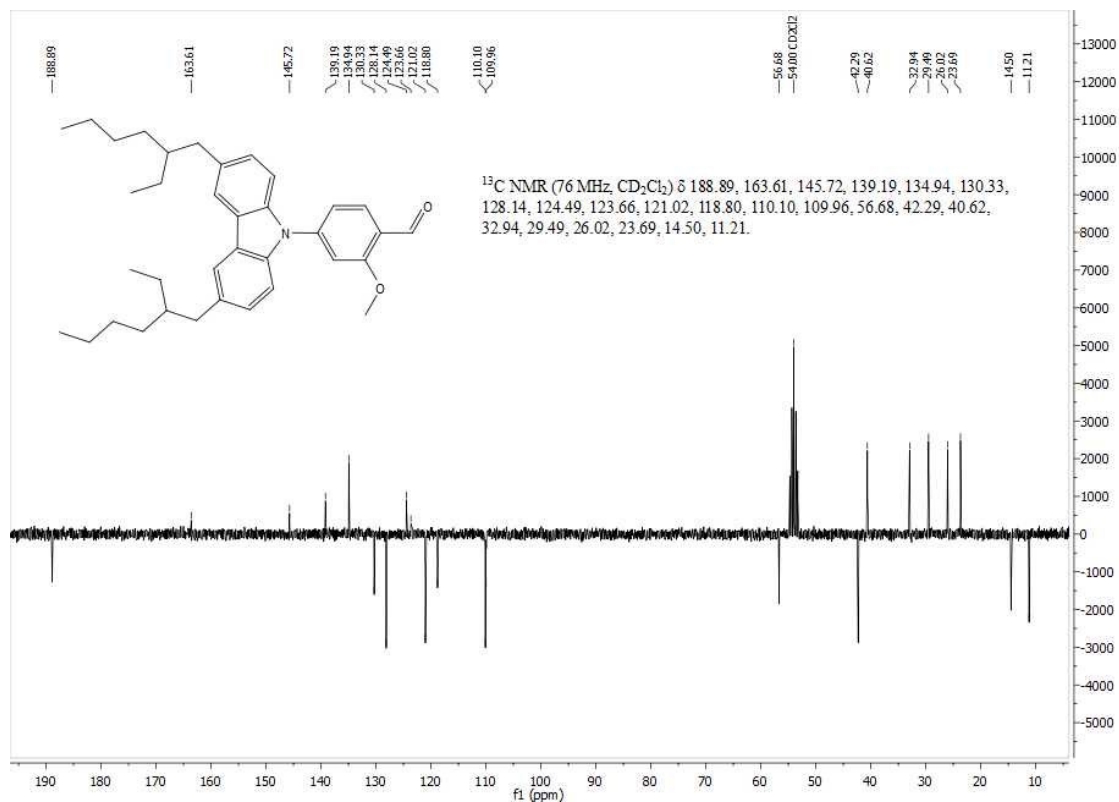

**Figure S14.** <sup>13</sup>C-APT NMR (76 MHz, CD<sub>2</sub>Cl<sub>2</sub>) of **5**.

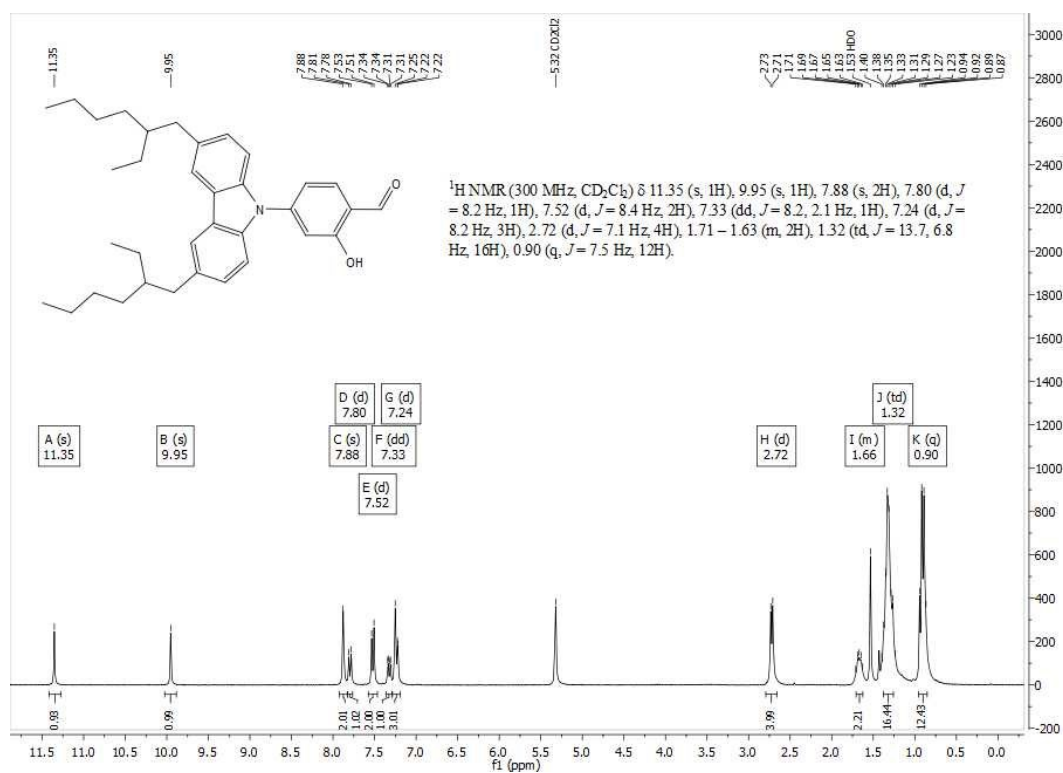

**Figure S15.** <sup>1</sup>H NMR (300 MHz, CD<sub>2</sub>Cl<sub>2</sub>) of **6**.

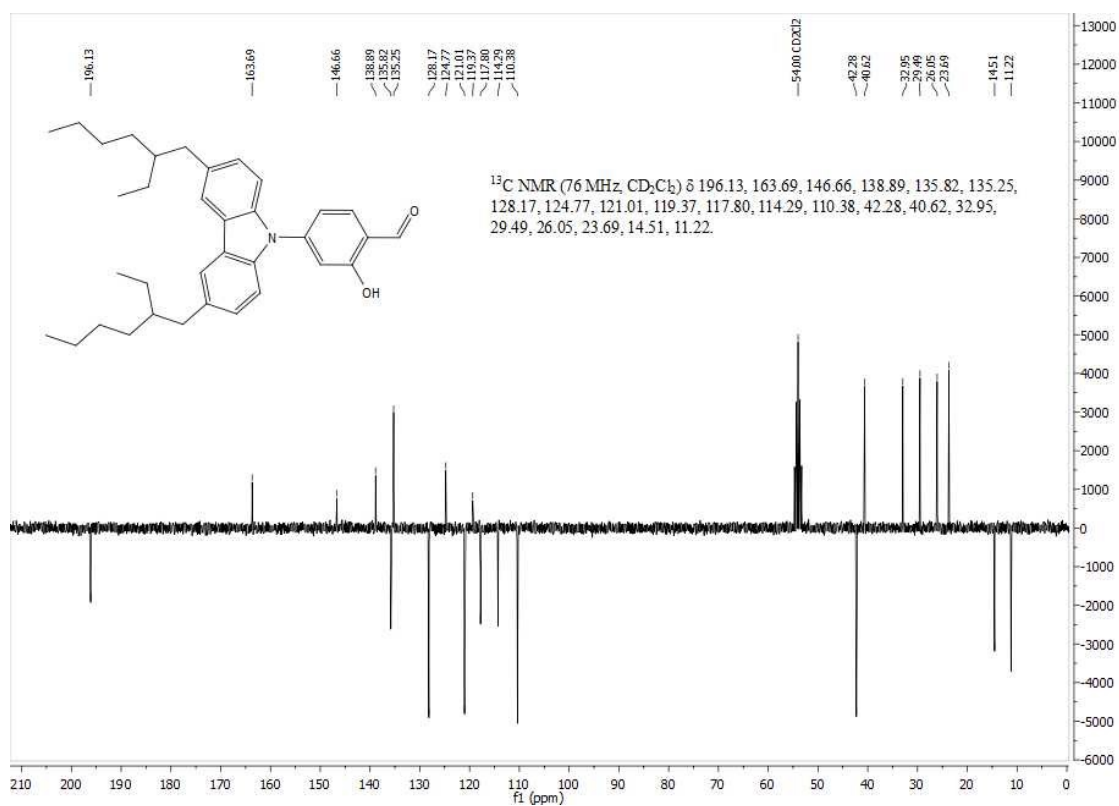

**Figure S16.** <sup>13</sup>C-APT NMR (76 MHz, CD<sub>2</sub>Cl<sub>2</sub>) of **6**.

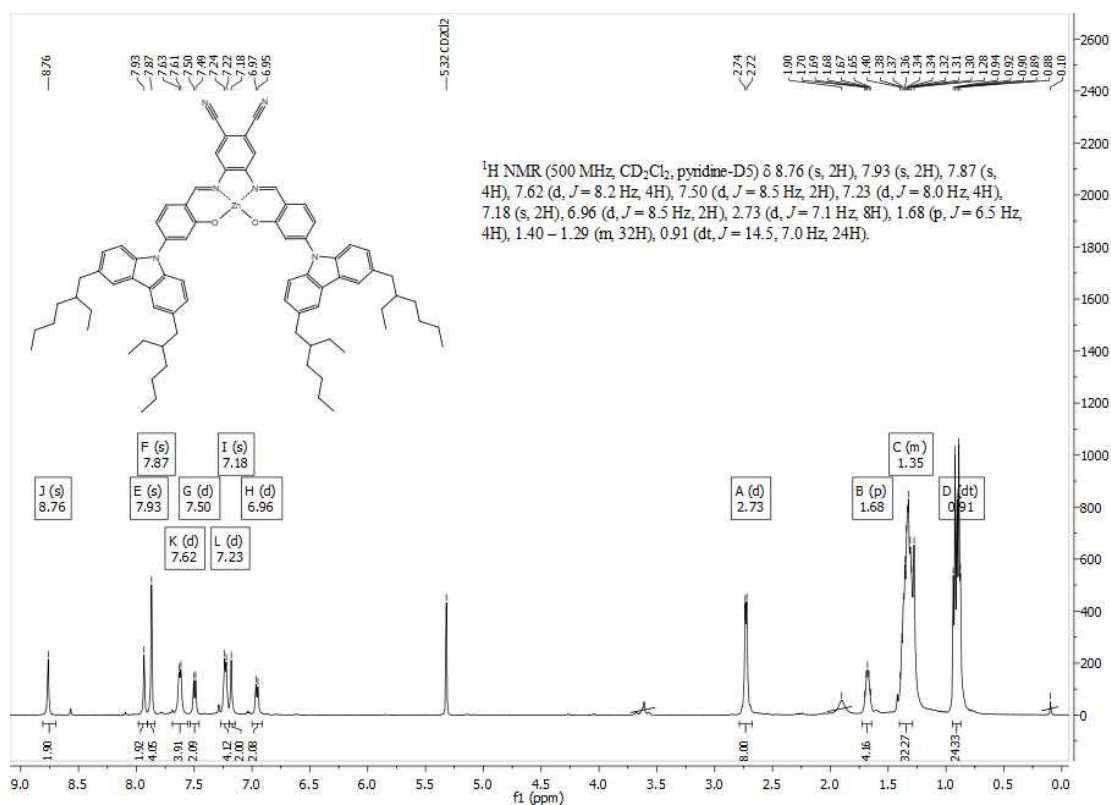

**Figure S17.** <sup>1</sup>H NMR (500 MHz, CD<sub>2</sub>Cl<sub>2</sub>, pyridine-D<sub>5</sub>) of ZnPH-Cz.

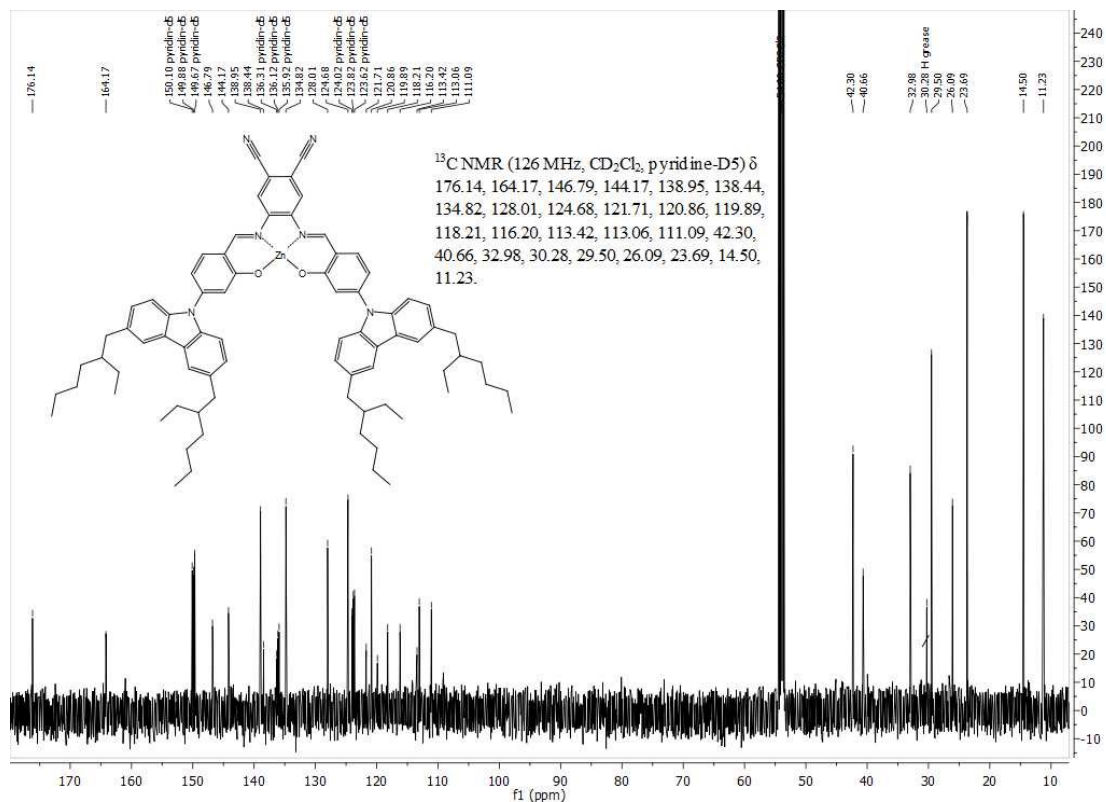

**Figure S18.** <sup>13</sup>C-NMR (126 MHz, CD<sub>2</sub>Cl<sub>2</sub>, pyridine-D<sub>5</sub>) of ZnPH-Cz.



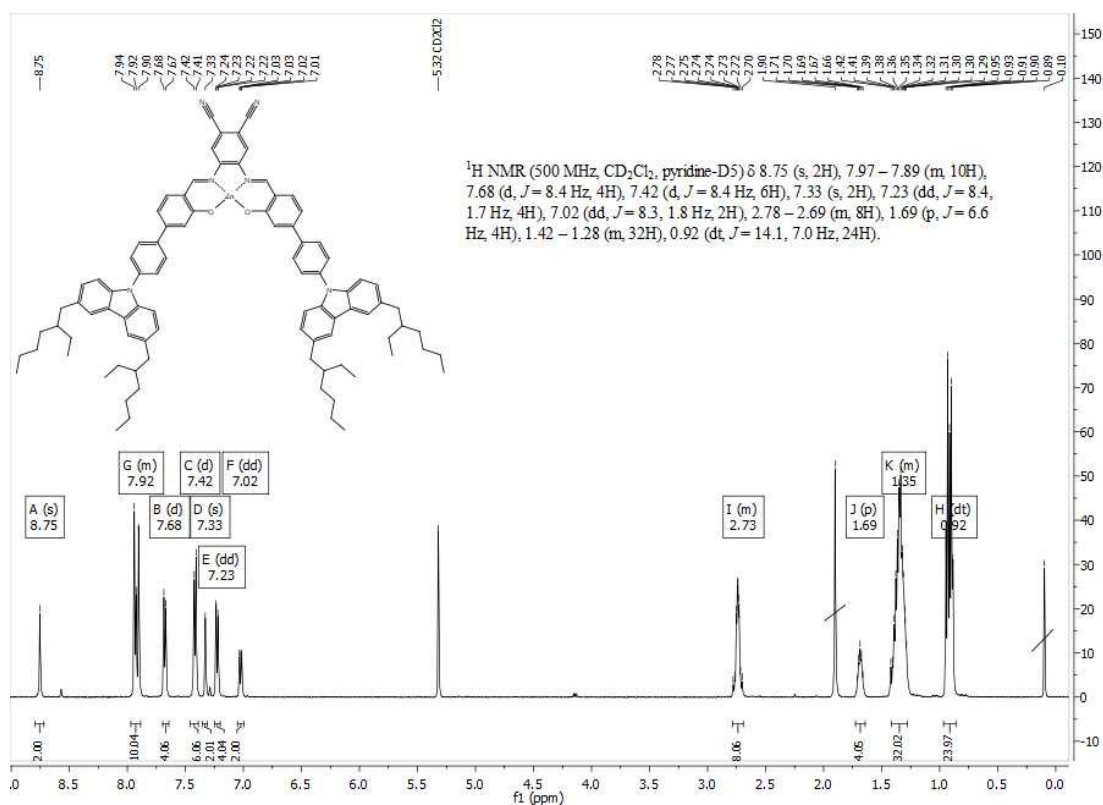

**Figure S19.** <sup>1</sup>H NMR (500 MHz, CD<sub>2</sub>Cl<sub>2</sub>, pyridine-D<sub>5</sub>) of ZnPH-Ph-Cz.

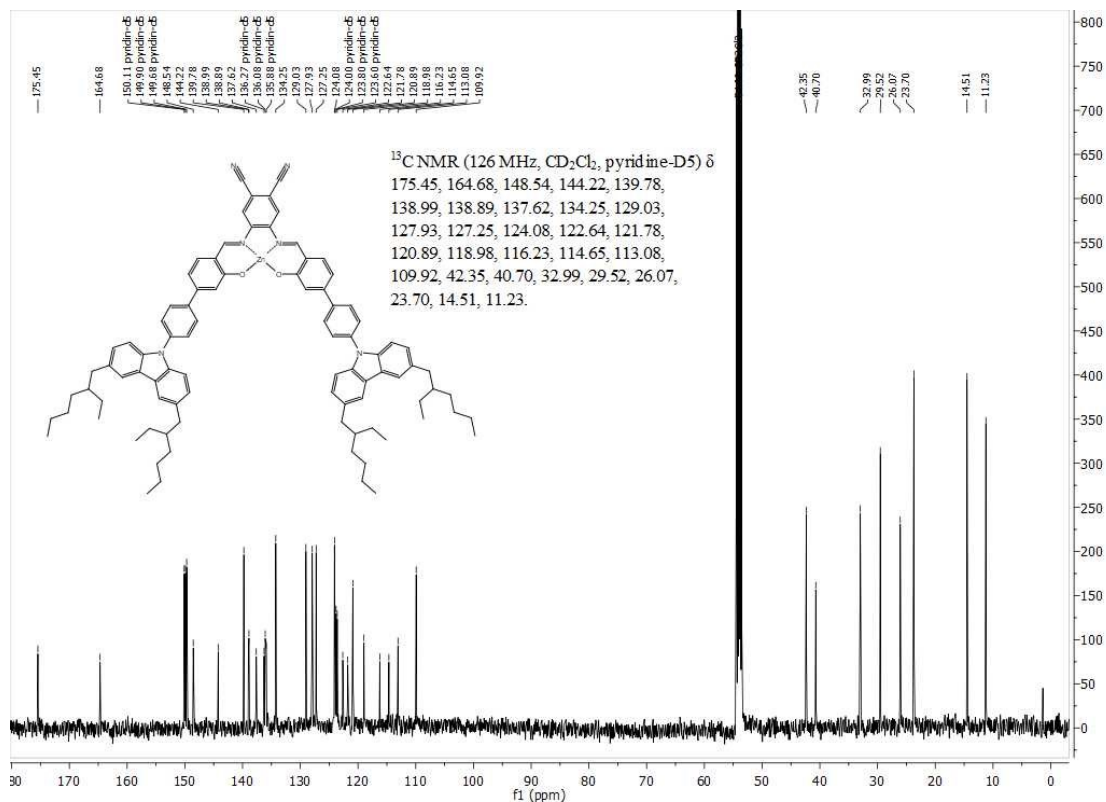

**Figure S20.** <sup>13</sup>C- NMR (126 MHz, CD<sub>2</sub>Cl<sub>2</sub>, pyridine-D<sub>5</sub>) of ZnPH-Ph-Cz.

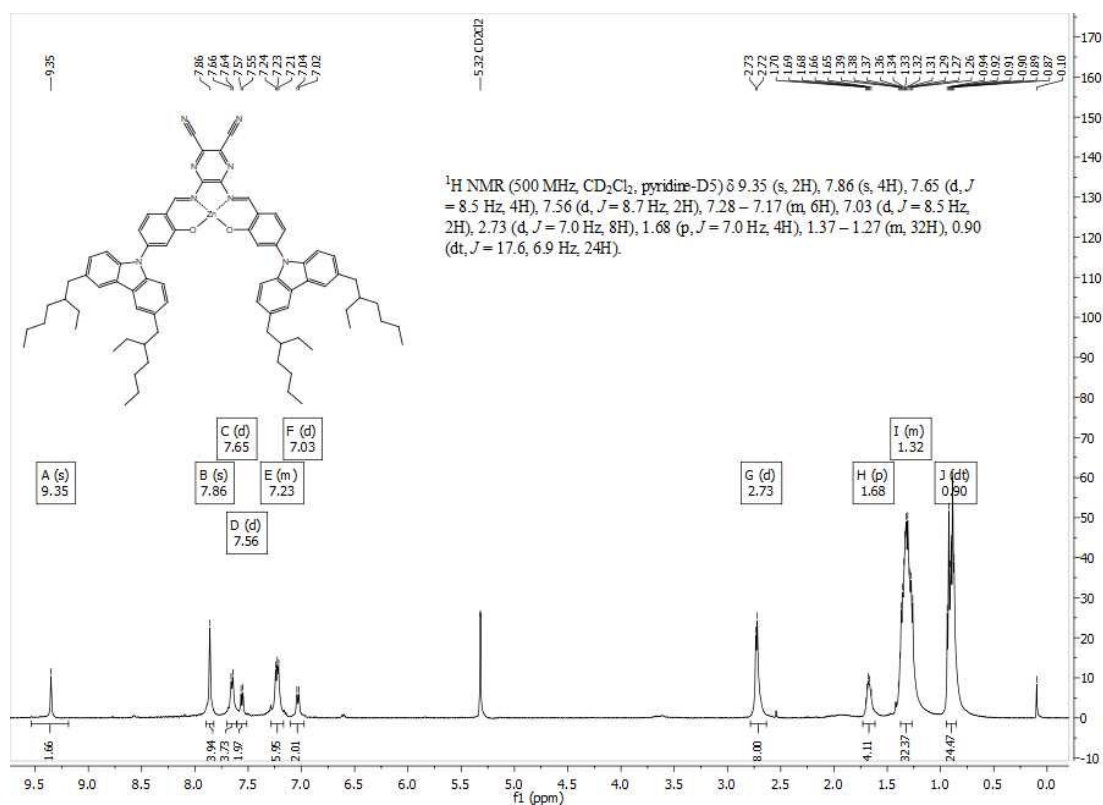

**Figure S21.** <sup>1</sup>H NMR (500 MHz, CD<sub>2</sub>Cl<sub>2</sub>, pyridine-D<sub>5</sub>) of ZnPZ-Cz.

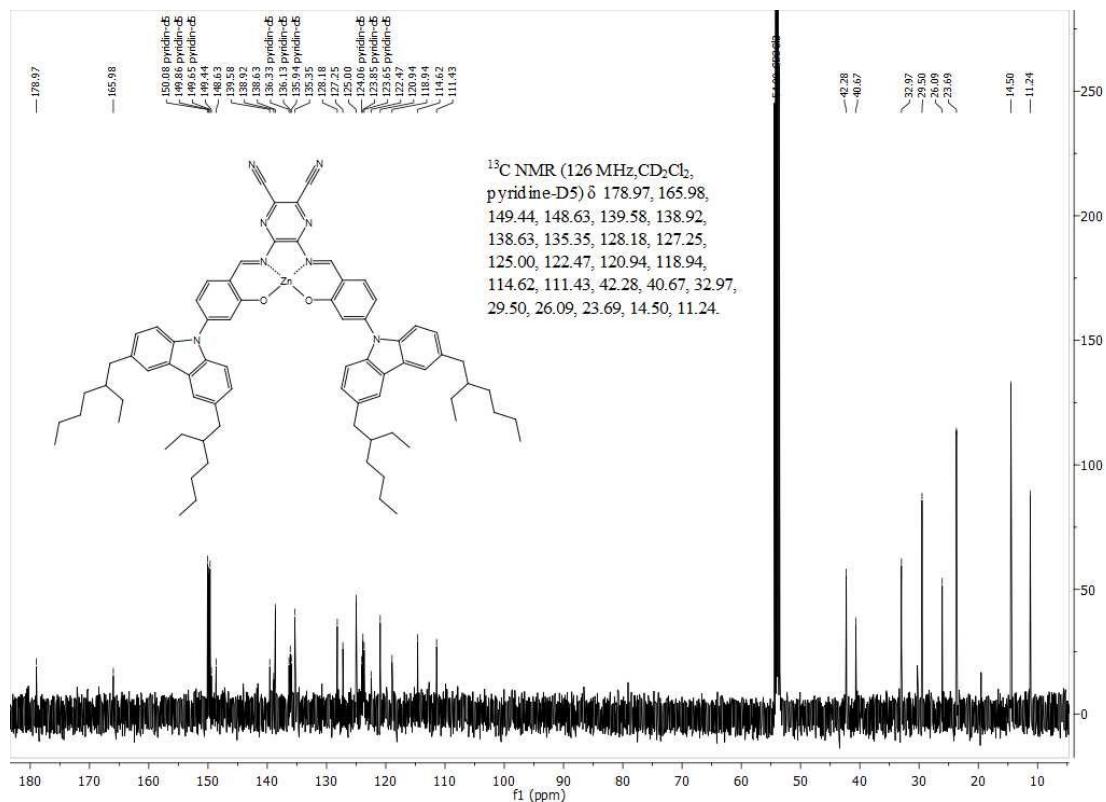

**Figure S22.** <sup>13</sup>C- NMR (126 MHz, CD<sub>2</sub>Cl<sub>2</sub>, pyridine-D<sub>5</sub>) of ZnPZ-Cz.

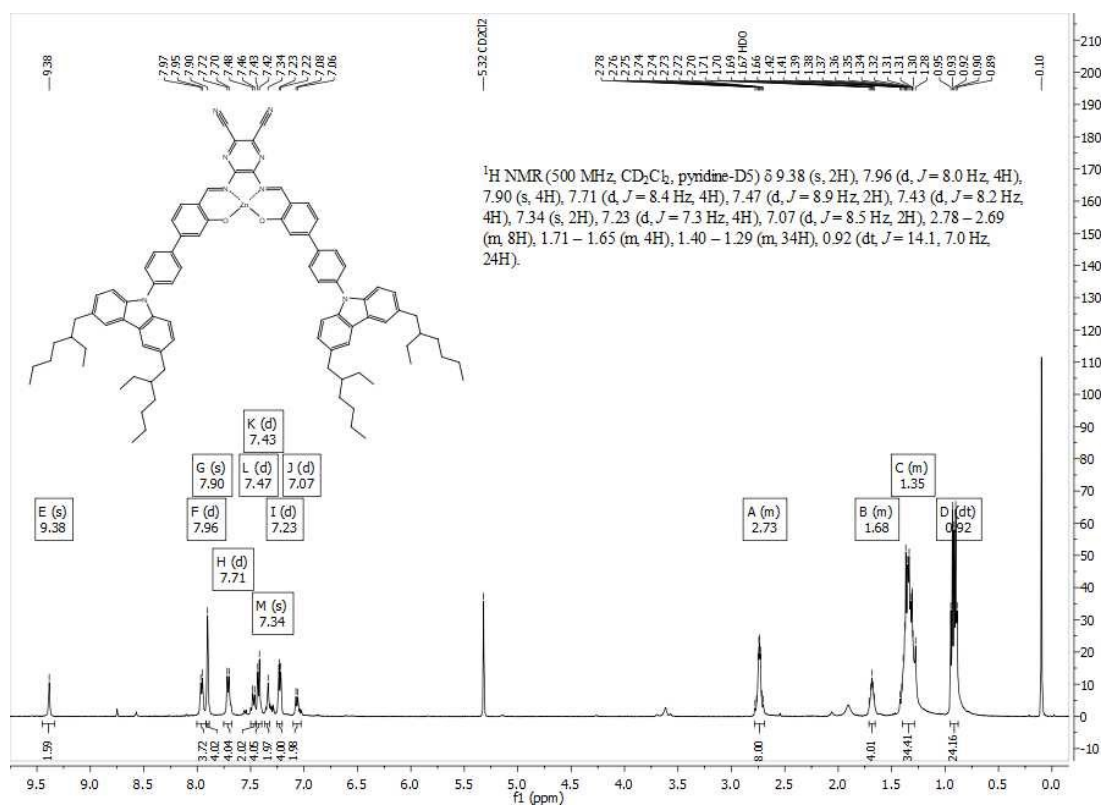

**Figure S23.** <sup>1</sup>H NMR (500 MHz, CD<sub>2</sub>Cl<sub>2</sub>, pyridine-D<sub>5</sub>) of ZnPZ-Ph-Cz.

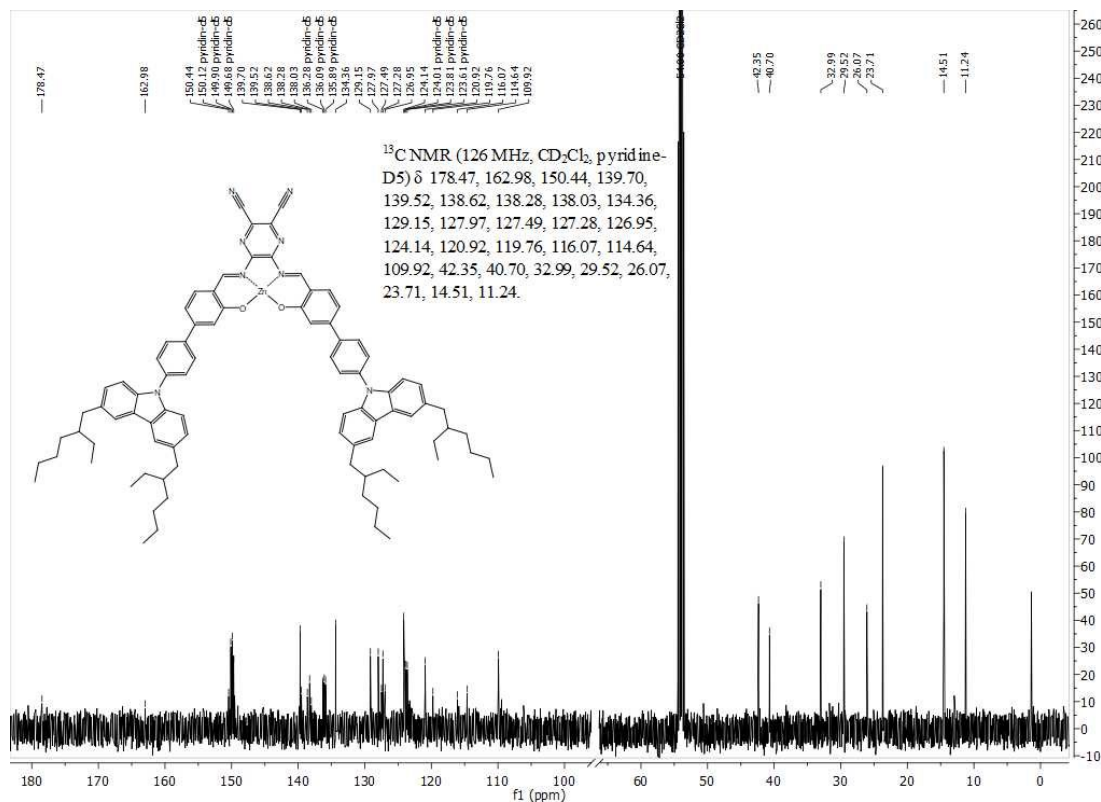

**Figure S24.** <sup>13</sup>C- NMR (126 MHz, CD<sub>2</sub>Cl<sub>2</sub>, pyridine-D<sub>5</sub>) of ZnPZ-Ph-Cz.



### 3 MS Spectra

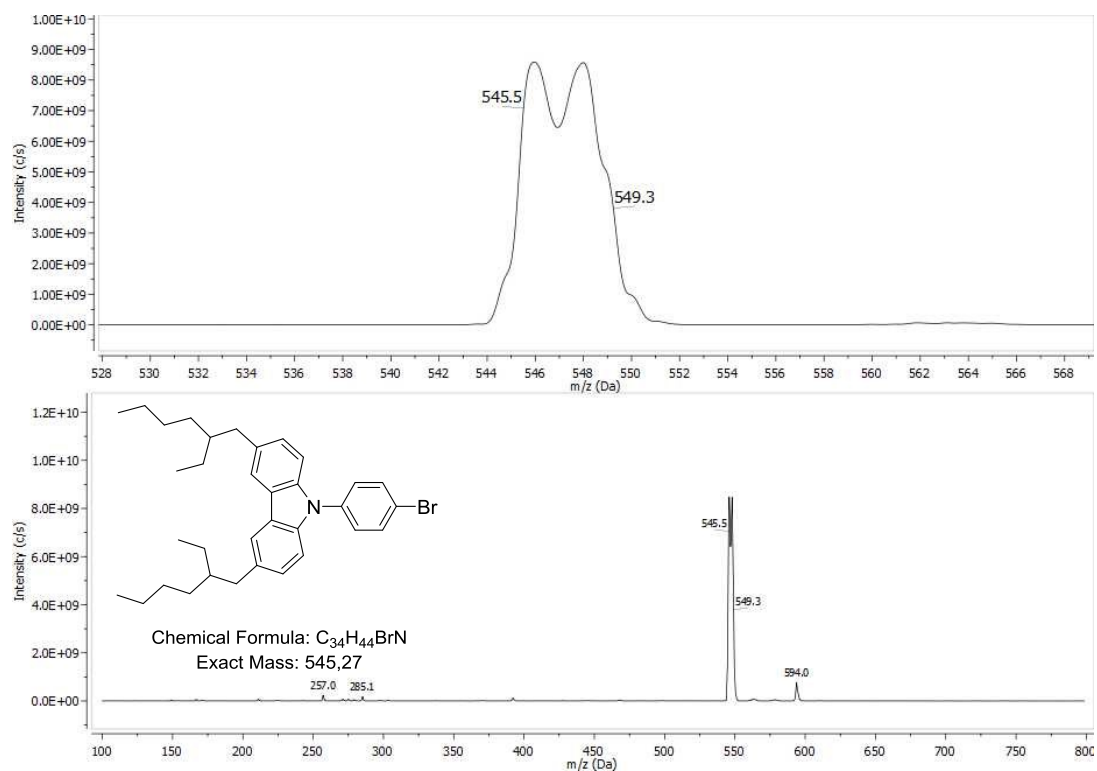

**Figure S25.** Mass spectrum (APCI-MS) of **2**.

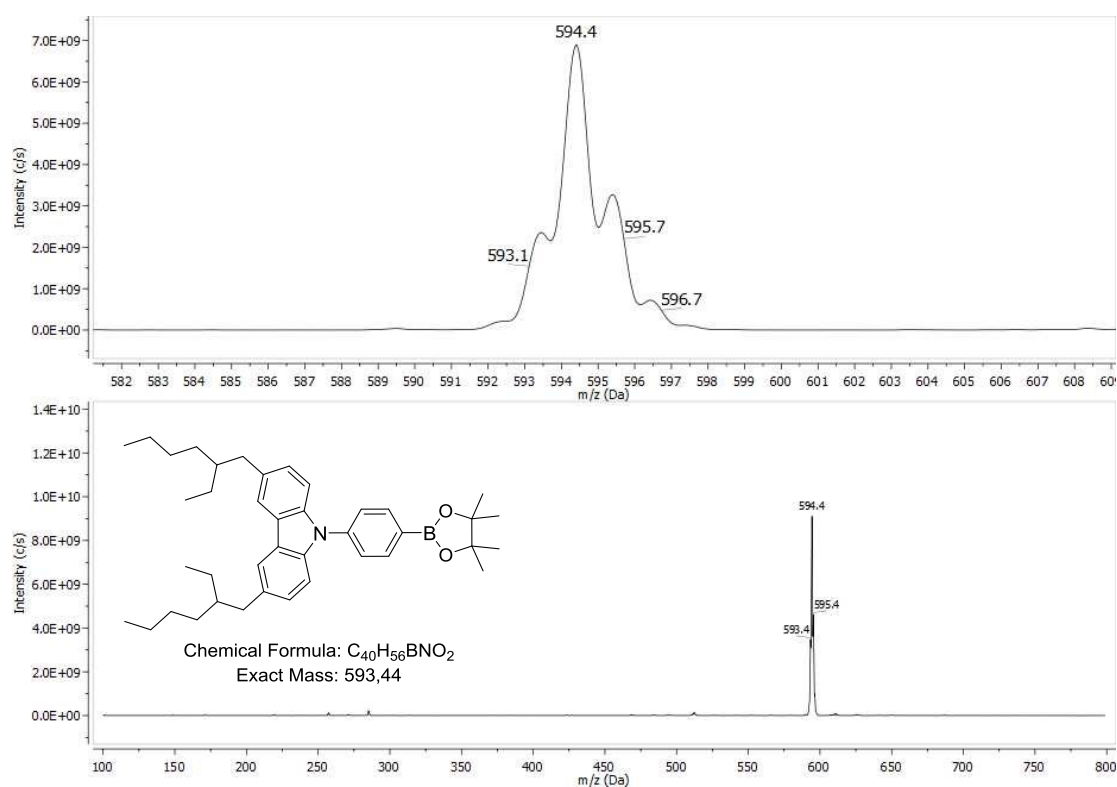

**Figure S26.** Mass spectrum (APCI-MS) of **3**.

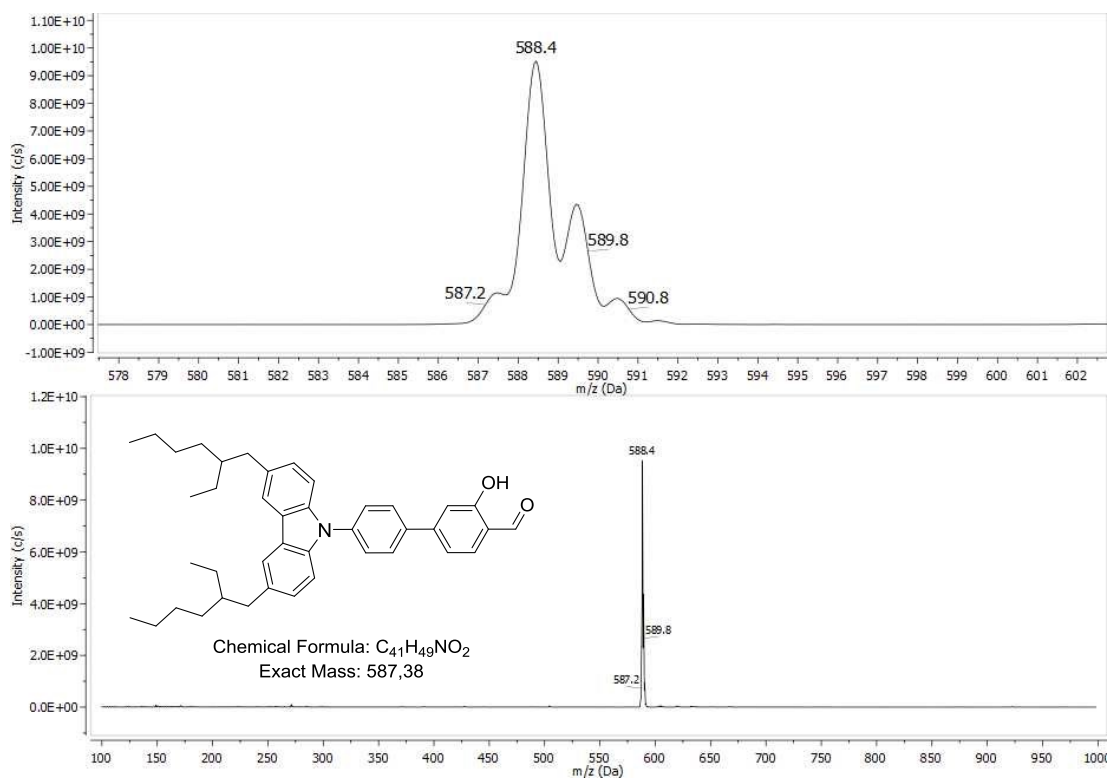

**Figure S27.** Mass spectrum (APCI-MS) of **4**.

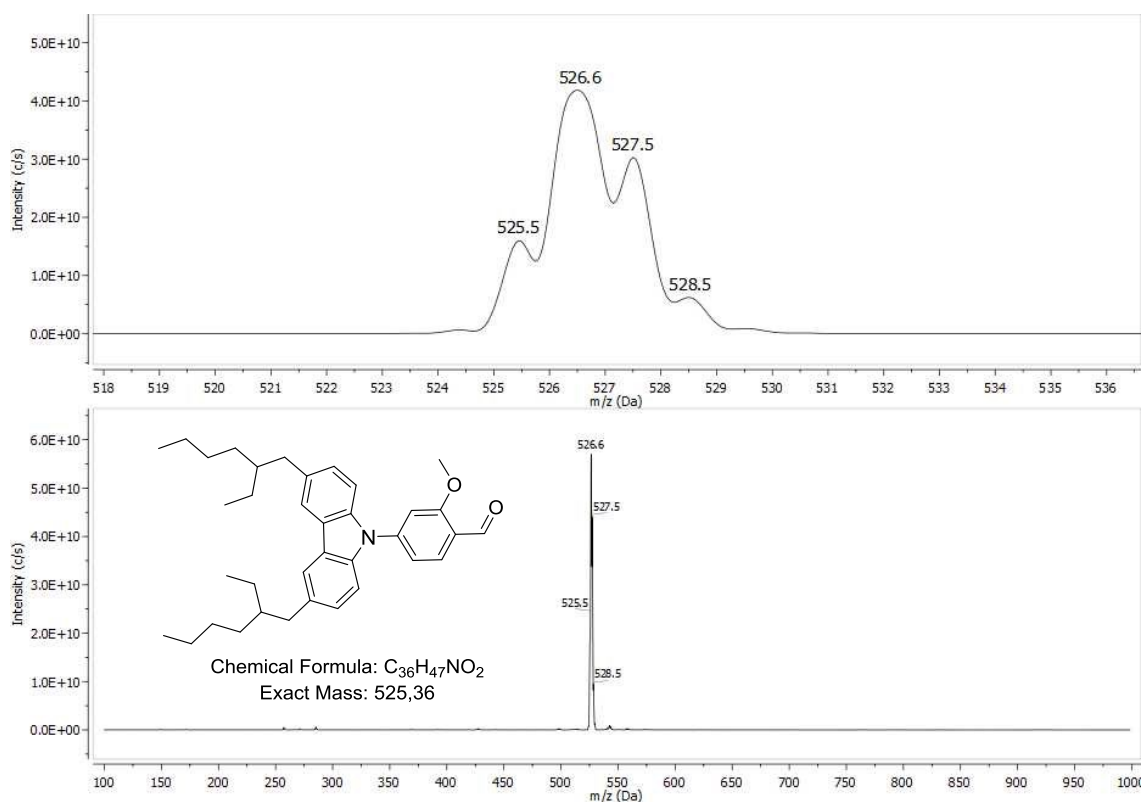

**Figure S28.** Mass spectrum (APCI-MS) of **5**.

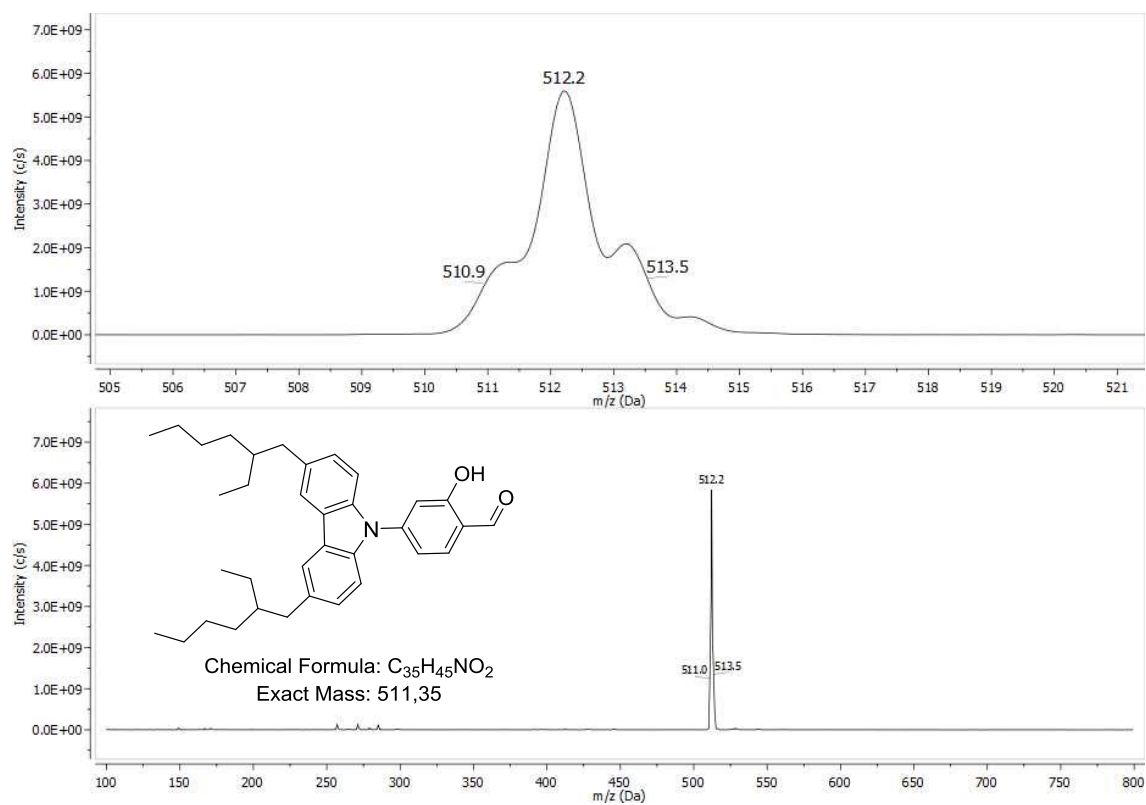

**Figure S29.** Mass spectrum (APCI-MS) of **6**.

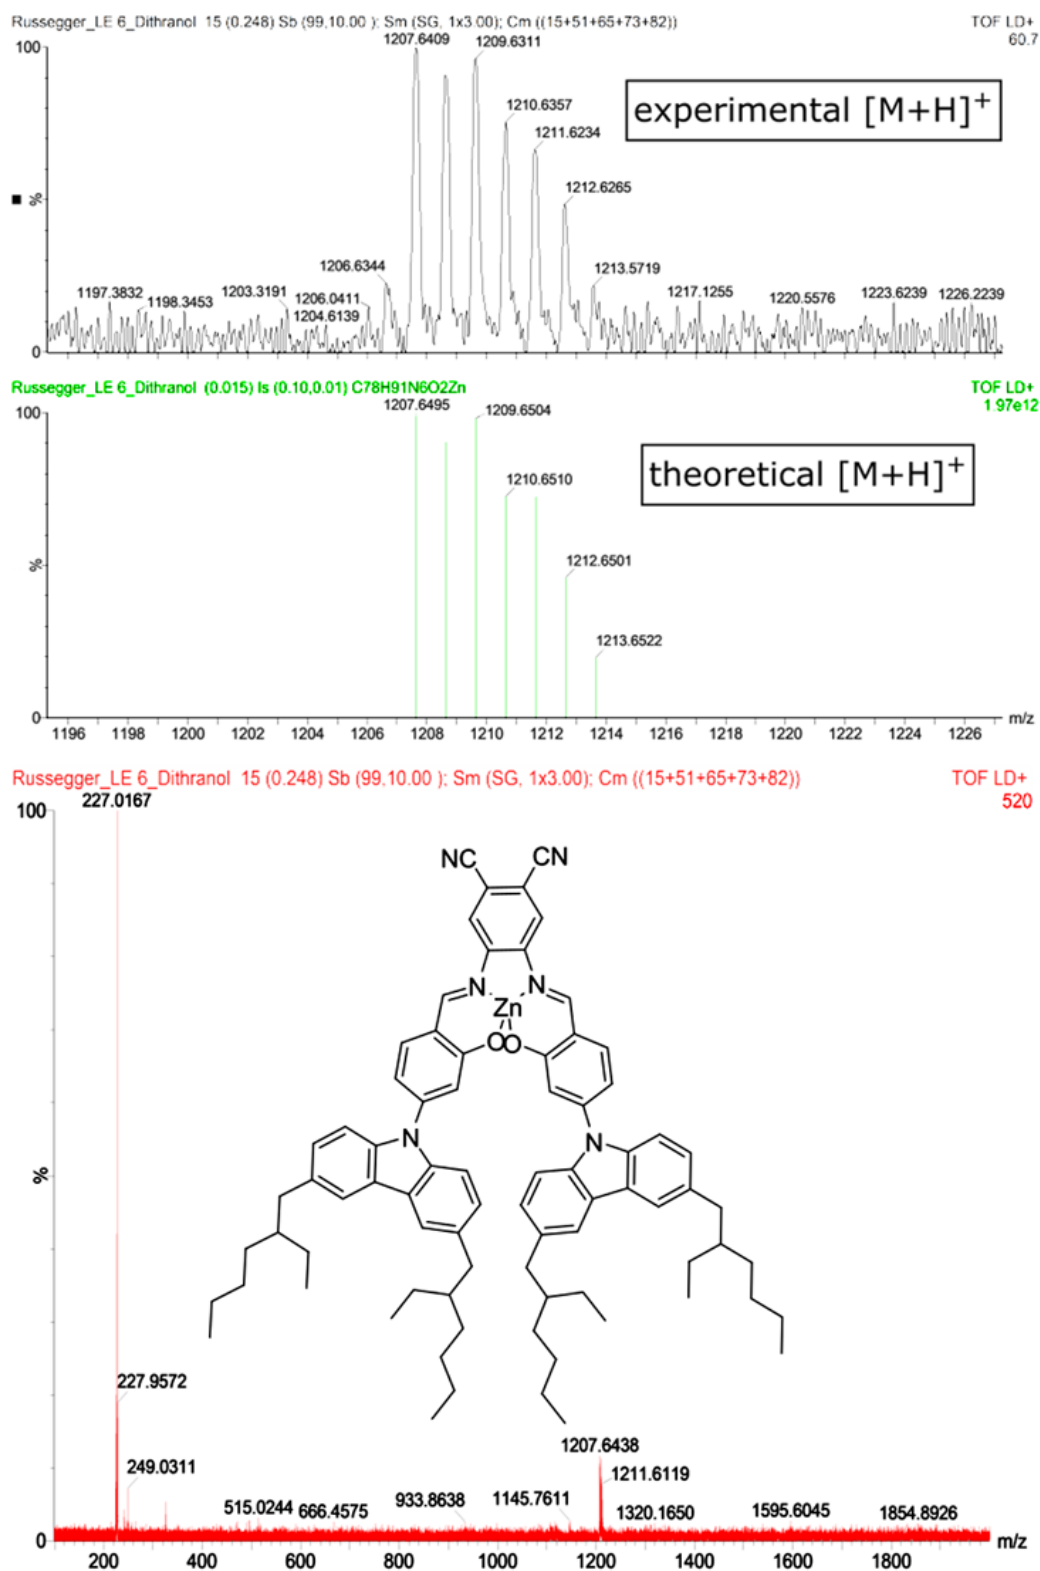

**Figure S30.** Mass spectra (MALDI-TOF) of **ZnPH-Cz** in dithranol matrix.

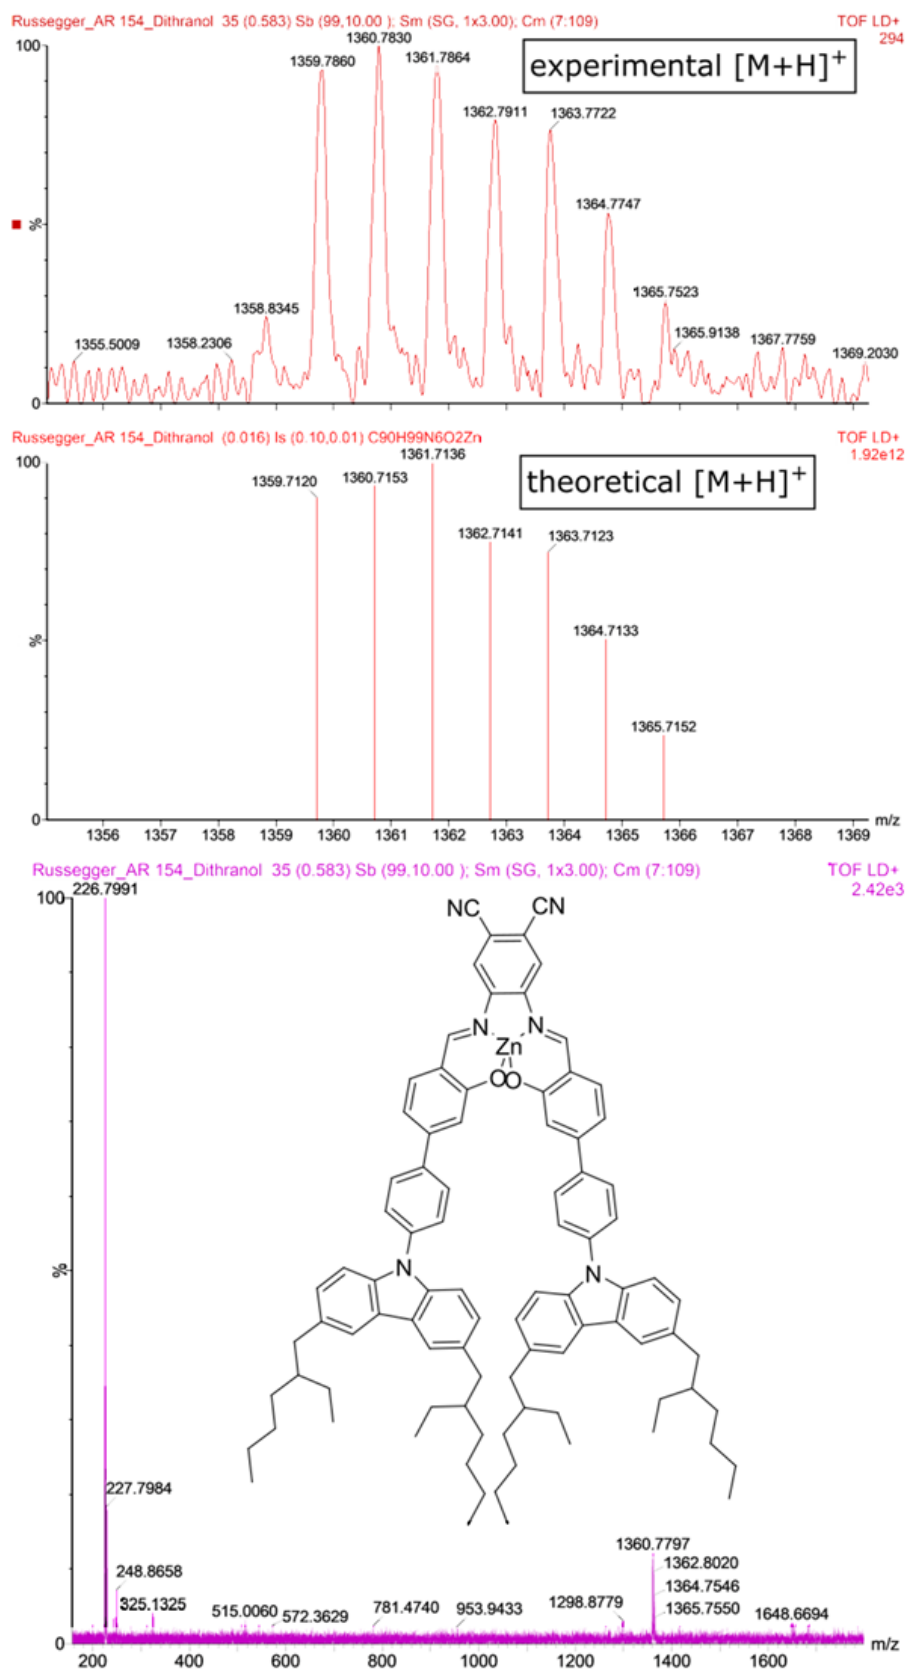

**Figure S31.** Mass spectra (MALDI-TOF) of **ZnPH-Ph-Cz** in dithranol matrix.

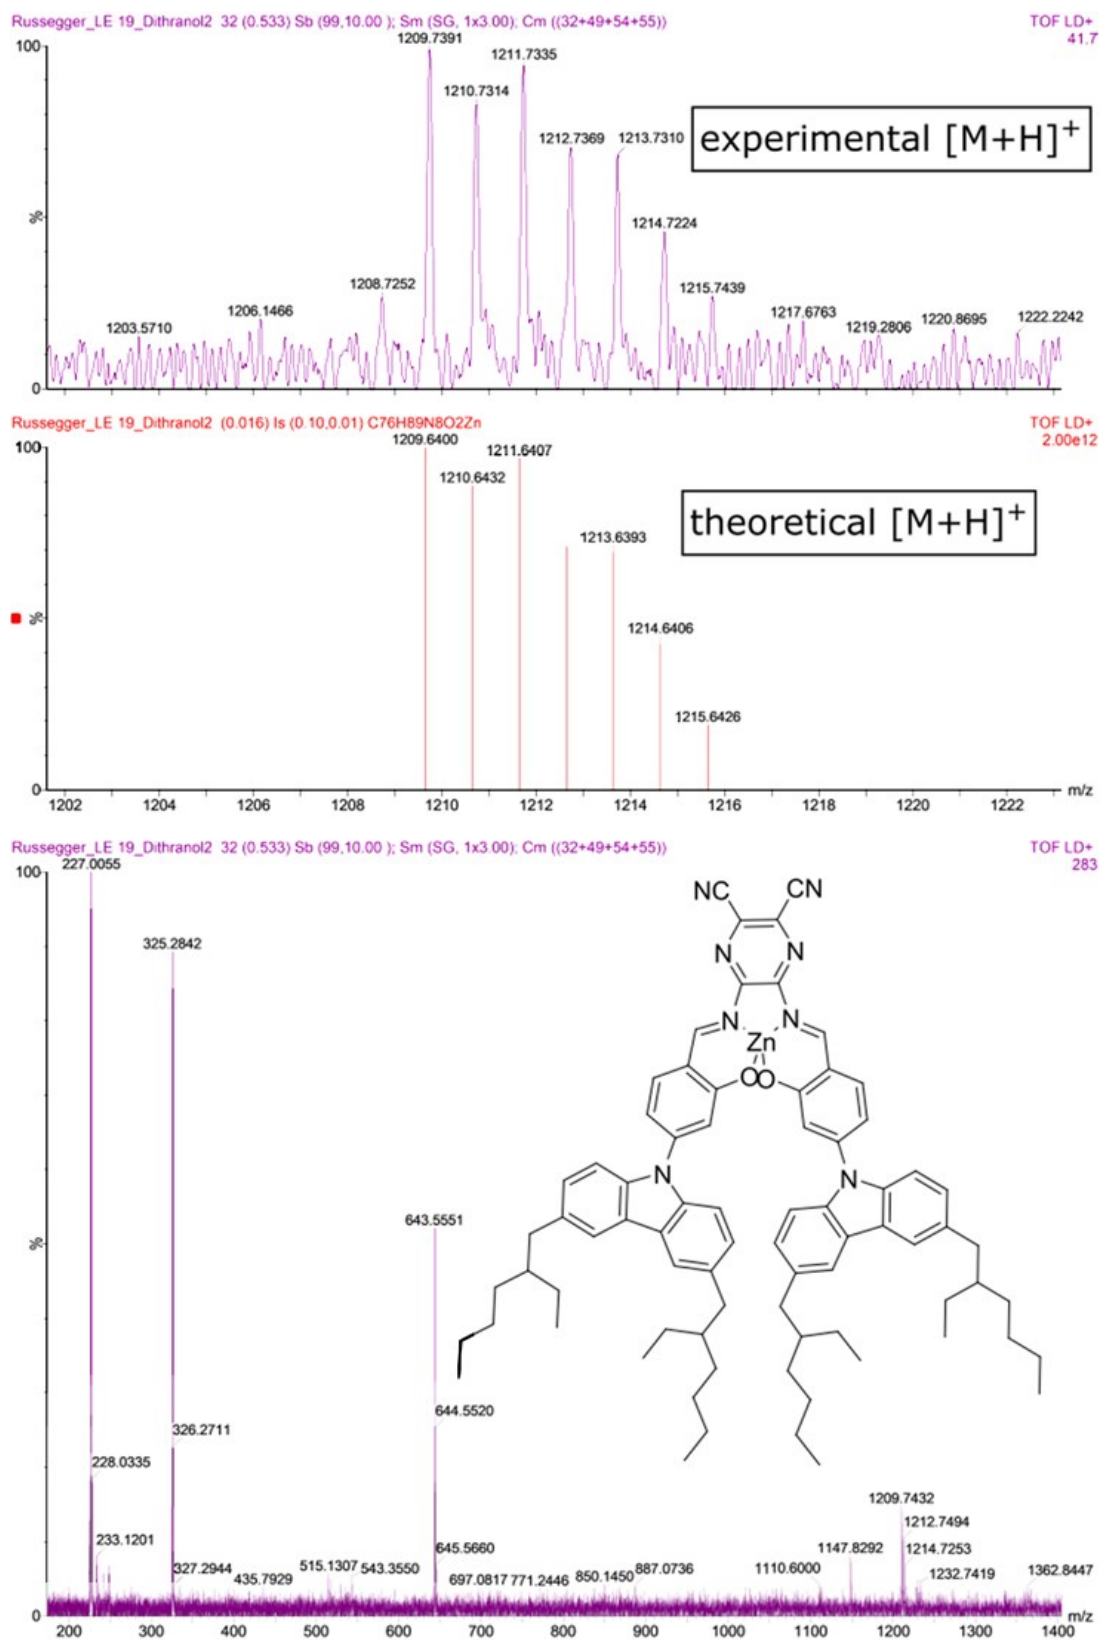

**Figure S32.** Mass spectra (MALDI-TOF) of **ZnPZ-Cz** in dithranol matrix.

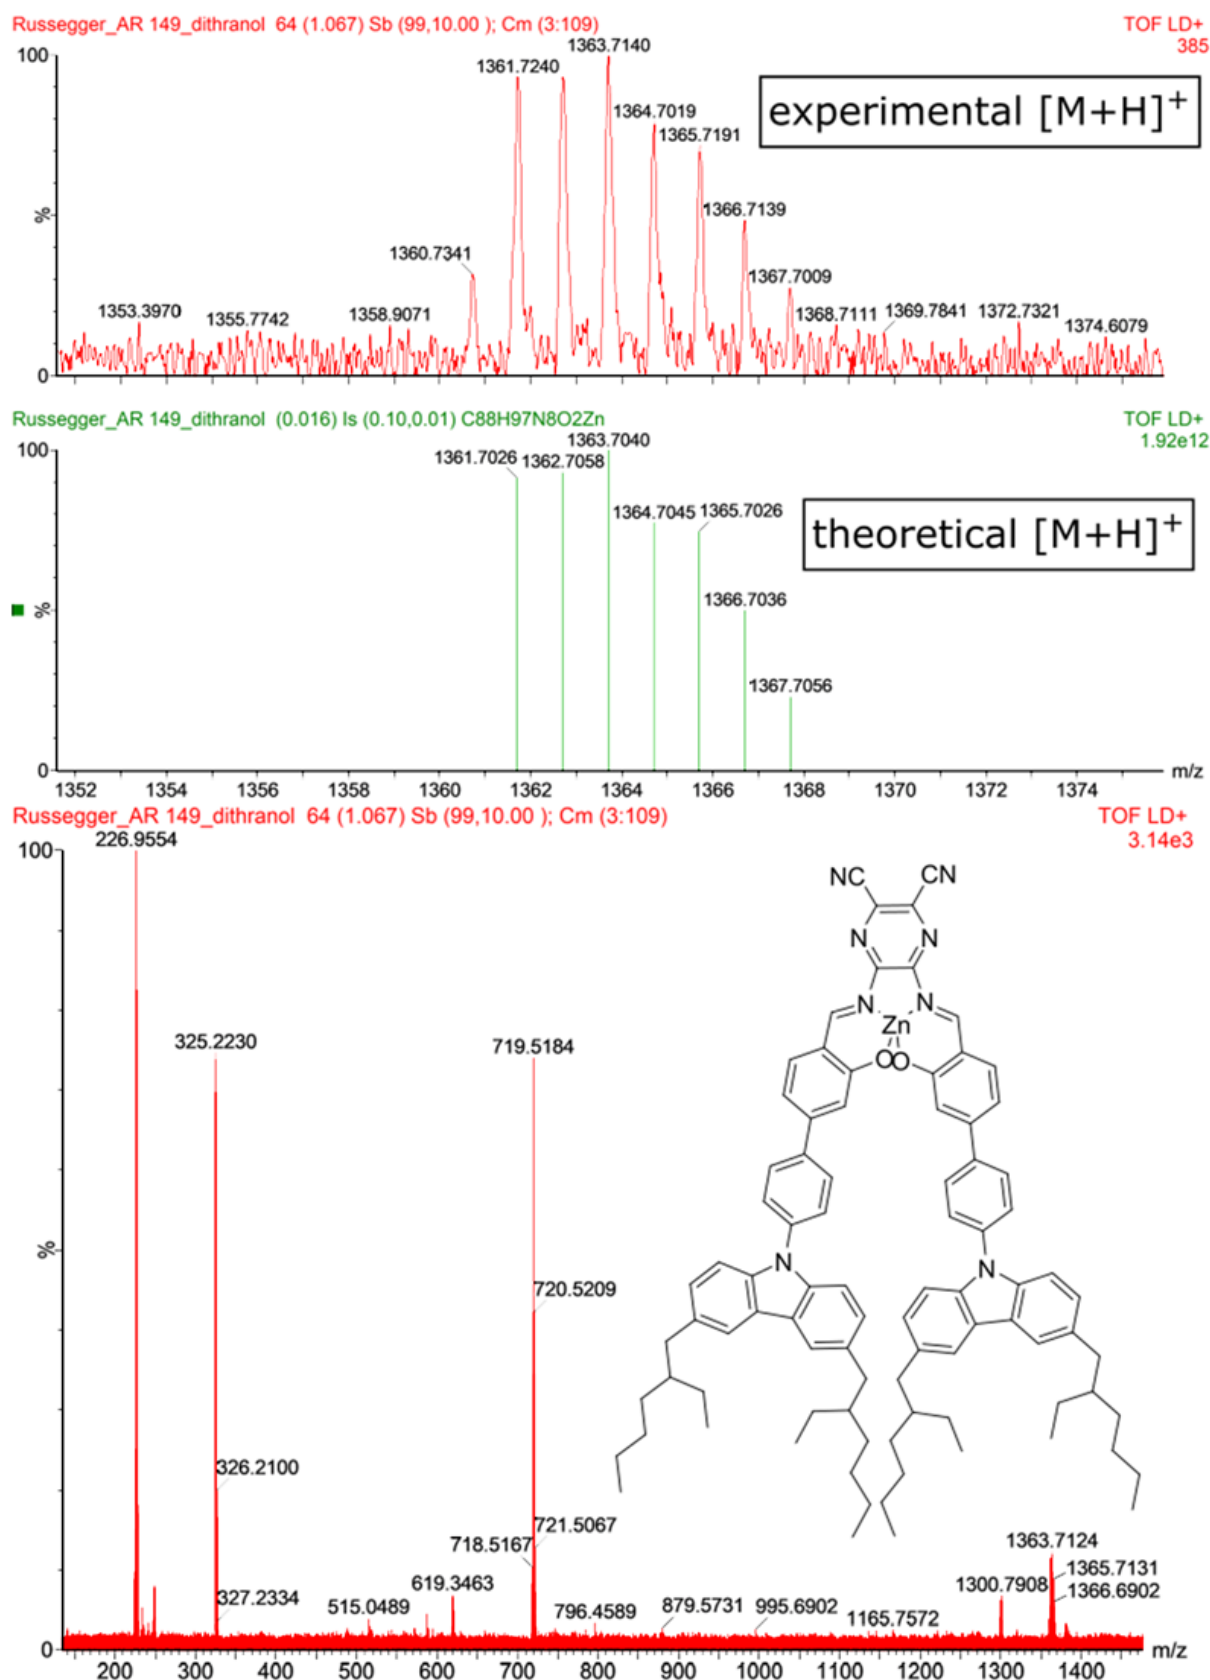

**Figure S33.** Mass spectra (MALDI-TOF) of ZnPZ-Ph-Cz in dithranol matrix.
